## VSX-1/2 Are Potent Bactericidal Antibody-Peptide Conjugates

1 Development of an antibody fused with an antimicrobial peptide targeting *Pseudomonas*  
2 *aeruginosa*: a new approach to prevent and treat bacterial infections

3 *Running Title*: VSX-1/2 Are Potent Bactericidal Antibody-Peptide Conjugates

4 Johnson, Kenneth<sup>1</sup>; Delaney, James C.<sup>1</sup>; Guillard, Thomas<sup>2</sup>; Reffuveille, Fanny<sup>2</sup>, Varin-Simon,  
5 Jennifer<sup>2</sup>, Li, Kai<sup>1</sup>; Wollacott, Andrew<sup>1</sup>; Frapy, Eric<sup>3</sup>; Mong, Surin<sup>4</sup>; Tissire, Hamid<sup>1</sup>;  
6 Viswanathan, Karthik<sup>1</sup>; Touti, Faycal<sup>4</sup>; Babcock, Gregory J.<sup>1</sup>; Shriver, Zachary<sup>1,#</sup>; Pentelute,  
7 Bradley L.<sup>4</sup>; Plante, Obadiah<sup>1,\*</sup> and Skurnik, David<sup>3,5-6,#</sup>;

8

### 9 *Affiliations*

- 10 1. Visterra, Inc. 275 Second Avenue, Waltham, MA 02451  
11 2. Inserm UMR-S 1250 P3 Cell, Université de Reims-Champagne-Ardenne, Reims,  
12 France  
13 3. Université Paris Cité, INSERM, CNRS, Institut Necker Enfants Malades, F-75015  
14 Paris, France  
15 4. Department of Chemistry, Massachusetts Institute of Technology, 77 Massachusetts  
16 Avenue, Cambridge, MA 02139  
17 5. Service de Microbiologie Clinique, Hôpital Necker-Enfants Malades, Assistance  
18 Publique-Hôpitaux de Paris, Université de Paris Cité, Paris, France  
19 6. Division of Infectious Diseases, Department of Medicine, Brigham and Women's  
20 Hospital, Harvard Medical School, Boston, MA, USA

21 # To whom correspondence should be addressed - [zshriver@visterrainc.com](mailto:zshriver@visterrainc.com) and  
22 [david.skurnik@inserm.fr](mailto:david.skurnik@inserm.fr)

23 \*Current address – Moderna Therapeutics, 200 Technology Square, Cambridge, MA 02139

24

25

26

## VSX-1/2 Are Potent Bactericidal Antibody-Peptide Conjugates

27 **Abstract:** The increase of emerging drug resistant Gram-negative bacterial infections is of  
28 global concern. In addition, there is growing recognition that compromising the microbiota,  
29 through the use of broad spectrum antibiotics, may affect patient health in the long term.  
30 Therefore, there is the need to develop new -cidal strategies to combat Gram-negative infections  
31 that would consider these specific issues. In this study, we report and characterize one such  
32 approach, the antibody-drug conjugates (ADCs) that combine (i) targeting a specific pathogenic  
33 organism through a monoclonal antibody with (ii) the high killing activity of antimicrobial  
34 peptides. We focused on a major pathogenic Gram-negative bacterium associated with  
35 antibacterial resistance: *Pseudomonas aeruginosa* and designed an ADC by fusing an  
36 antimicrobial peptide at the C-terminal end of the V<sub>H</sub> and/or V<sub>L</sub>-chain of a monoclonal  
37 antibody, VSX, that targets the core of *P. aeruginosa* lipopolysaccharide (LPS). This ADC  
38 demonstrated appropriately minimal levels of toxicity to mammalian cells and rapidly kills *P.*  
39 *aeruginosa* strains through several mechanisms while protecting mice from *P. aeruginosa* lung  
40 infection when administered therapeutically. Furthermore, we found that the ADC was  
41 synergistic with several classes of antibiotics. This approach described in this study may result  
42 in a widely useful strategy to target specific pathogenic microorganisms without augmenting  
43 further antibiotic resistance.

44

45 **Author Summary:** The increasing of emerging drug resistant bacterial infections is a worldwide  
46 issue and infections caused by antibiotic resistant Gram-negative pathogens are particularly  
47 concerning. In addition, there is now growing recognition that disruption of the microbiota,  
48 through the use of broad spectrum antibiotics, may affect patient health in the long term.  
49 Therefore, there is the need to develop new -cidal strategies to combat Gram-negative infections  
50 while preserving the microbiota and also avoid enhancement of antibiotic resistance. We report  
51 and characterize here one such approach by using a specific monoclonal antibody associated  
52 with the potent killing activity of antimicrobial peptides in the form of an antibody-drug  
53 conjugate (ADC). The selected pathogenic bacterium was *Pseudomonas aeruginosa*, that  
54 presents numerous markers for both innate and acquired antibiotic resistance. The ADC lacked  
55 significant cytotoxicity against mammalian cells and was shown to be effective both *in vitro*  
56 and *in vivo* against *P. aeruginosa*.

57

## 58 **Introduction**

59 Antimicrobial resistance is a serious, and growing, public health threat (1). The Centers  
60 for Disease Control and Prevention (CDC) estimates that in the United States, more than 2.6  
61 million people are infected each year with antibiotic-resistant microorganisms, with at least  
62 44,000 dying as a result (2) Of the various resistant human pathogens, Gram-negative bacteria,  
63 particularly the carbapenem-resistant *Enterobacterales* (CRE), the multi-drug resistant (MDR)  
64 *Pseudomonas aeruginosa* and *Acinetobacter baumannii* are among the most concerning. *P.*  
65 *aeruginosa* is intrinsically resistant to many antibiotics, limiting treatment options.  
66 Furthermore, the acquisition of resistance elements leading to MDR and even pan-resistant  
67 strains has created a public health concern with potentially untreatable *P. aeruginosa* strains  
68 (3). The CDC in its 2019 report designated MDR *P. aeruginosa* as a “Serious Threat” (2) and  
69 the World Health Organization in 2017 classified carbapenem-resistant *P. aeruginosa* as one  
70 of two “Priority 1: Critical Threats”. In addition, carbapenem-resistant *P. aeruginosa* strains  
71 were recently reported to be more fit and virulent *in vivo* (4, 5). This emerging situation warrants  
72 urgent development of new types of treatments and/or approaches to either prevent or treat *P.*  
73 *aeruginosa* infections (6).

74 Several classes of antibiotics are able to elicit rapid bactericidal effect with a greater  
75 than 99.9% reduction of the bacterial counts within four hours at peak concentrations (7).  
76 However, this very high killing ability is also associated with several shortcomings. First, these  
77 treatments induce strong selective pressure such that their use can invariably lead to the rapid  
78 emergence and dissemination of antibiotic resistance (8-10). Second, broad spectrum  
79 antibiotics act not only on the pathogenic strains, but also target the host microbiota, altering  
80 quickly and sometimes persistently its taxonomic, genomic and functional capacities, with  
81 potential negative consequences for the patient (11, 12). Thus, there is a need to develop novel

## VSX-1/2 Are Potent Bactericidal Antibody-Peptide Conjugates

82 targeted strategies to treat pathogenic organisms, particularly Gram-negative pathogens, with  
83 high killing abilities but with as few of these limitations as possible.

84 To this end, we describe the development and characterization of a new strategy to treat  
85 bacterial infections, even those caused by MDR or pan-resistant strains, combining the unique  
86 specificity of a monoclonal antibody (referred hereafter to as VSX (13)) with the direct-acting  
87 antibacterial activity of an antimicrobial peptide (AMP). While the principle of antibody-drug  
88 conjugate has recently been described to treat bacterial infection, to date, these first reports are  
89 mainly employing antibody-antibiotic conjugates (14). In this work, for the first time to our  
90 knowledge, we present an antibody conjugated with an antimicrobial peptide enabling a direct  
91 bactericidal activity against Gram negative bacteria by targeting their outer membrane. Our  
92 approach combines therefore the programmability of adding a strong antimicrobial activity with  
93 the benefits of a specific approach associated with the use of an antibody. To exemplify this  
94 approach, we focused on *P. aeruginosa* (15).

95 We find that our VSX-AMP constructs, henceforth referred to as antibody-drug  
96 conjugates, ADC, function with both direct bactericidal activity and effector function through  
97 the Fc domain of the antibody. We show here that such a construct demonstrates potent and  
98 selective activity *in vitro* and *in vivo*, demonstrating specific killing activity with little to no  
99 non-specific cytotoxicity to mammalian cells. Additionally, ADC constructs based on VSX and  
100 an antimicrobial peptide, employ a direct-acting effect at the outer membrane surface, which  
101 does not require internalization of the ADC, thereby circumventing the need for an agent that  
102 must pass through the double membrane of Gram-negative pathogens. Taken together, the data  
103 presented here demonstrate that our ADC constructs provide a therapeutic option for managing  
104 *P. aeruginosa* infections, promoting antibiotic stewardship and sparing the host microbiota.

105

106

## VSX-1/2 Are Potent Bactericidal Antibody-Peptide Conjugates

### 107 **Results and Discussion**

108 *Selection of an Antibody.* VSX is an antibody that engages the inner core of LPS, including  
109 phosphorylated heptose, that is conserved across *Pseudomonas* species including *P. aeruginosa*  
110 (13). By engaging such a highly conserved site on a predominate antigen, with approximately  
111 one million copies at the outer membrane (16), VSX has the potential to be a broad spectrum  
112 immunotherapy for *P. aeruginosa* infection. As disclosed in more detail in (13), to arrive at  
113 VSX, we identified a starting mouse antibody and, using structure-guided approaches,  
114 engineered it to optimize contacts to the inner core glycan as well as improve the antibody's  
115 drug-like characteristics. Importantly, these previous studies identified that VSX is able to bind  
116 to a wide range of *Pseudomonas* species, including *P. aeruginosa* (both rough and smooth  
117 variants), suggesting to us that it could form the basis of a construct that could target the outer  
118 membrane of Gram negative organisms.

119 As a first step in the process of manufacturing an VSX-AMP construct, we characterized  
120 the biological activity of the VSX antibody itself, to establish a baseline for additional studies.  
121 In particular, we examined the ability for VSX to kill *P. aeruginosa* in the presence of  
122 polymorphonuclear leukocytes (PMNs) and complement. VSX demonstrated activity in vitro  
123 using the opsonophagocytosis killing assay (OPKA, **Figure 1A**) against the reference strain  
124 PAO1 previously used in OPKA assays (17). In vivo, we used a mouse model pneumonia that  
125 we previously reported (4). As shown **Figure 1B**, VSX injected intraperitoneally four hours  
126 post infection was able to significantly protect mice infected by *P. aeruginosa* in our acute lung  
127 infection model (P=0,04. Log-Rank test).

128  
129 *Selection of an AMP to be conjugated with VSX.* To improve the in vitro and in vivo VSX  
130 killing abilities (**Figure 1**), we sought to arm VSX with direct killing activity, without the need  
131 for recruitment of either complement or PMNs (18), through the addition of a bactericidal

## VSX-1/2 Are Potent Bactericidal Antibody-Peptide Conjugates

132 antimicrobial peptides (AMP). We chose to focus on AMPs due to their rapid killing activity  
133 and the proven efficacy of their mechanism of action, which approximated that of the last line  
134 of defense of our current antibiotics, the polymyxins (19).

135 To identify an optimal AMP to be used for our antibody-drug conjugate, we completed a robust  
136 structure-activity campaign to identify AMPs that (1) are active at the cell surface and hence do  
137 not require internalization; (2) are bactericidal against *P. aeruginosa* and (3) have low  
138 hemolytic and cytotoxic activity. To this end, we utilized a bioinformatics-driven workflow  
139 coupled with experimental testing, to identify potent AMPs with a high therapeutic index. We  
140 implemented a screening strategy that clustered peptides based on their underlying  
141 physicochemical properties, followed by characterization of representative members from each  
142 cluster. Here we used YADAMP (<http://www.yadamp.unisa.it/>), a database of AMPs that  
143 contains over 2,500 sequences of peptides with reported antibacterial activity (**Figure 2A, top**).

144 Then, clustering was performed by utilizing a K-means algorithm using calculated properties  
145 that have been reported to be relevant to antimicrobial activity (peptide length, predicted  
146 helicity, predicted hydrophobicity, percentage of select amino acids [Lys, Arg, Trp, Cys, His], and  
147 charge at pH 7, pH 5, and pH 9) (**Figure 2A, middle**). There are at least four distinct classes of  
148 antimicrobial peptides, based on their secondary structures:  $\beta$ -sheet,  $\alpha$ -helix, extended, and loop  
149 (20). Since we are focused here on AMP activity in the context of covalent addition to an  
150 antibody, we eliminated the loop class, due to the requirement of disulfides to stabilize  
151 secondary structure. In addition, we eliminated peptides that require oligomerization to elicit  
152 cell killing activity. With these limitations in mind, the class of amphipathic  $\alpha$ -helical peptides  
153 that act at the cell surface clearly represent a desirable peptide class for formation of an ADC.  
154 Furthermore, reports indicate that binding of approximately one to ten million AMPs per cell  
155 will induce cell killing (21). Thus, we reasoned that leveraging a multiple DAR ratio and using  
156 the VSX antibody to anchor the AMP in constant close proximity to the *P. aeruginosa* outer

## VSX-1/2 Are Potent Bactericidal Antibody-Peptide Conjugates

157 membrane creates a local high surface concentration of peptide allowing for possible membrane  
158 disruption and cell killing.

159 An initial set of 100 peptides was selected for experimental characterization using a panel  
160 of *in vitro* assays involving MIC testing against multiple bacterial strains, hemolytic evaluation  
161 and cytotoxicity. Once potent peptides with favorable characteristics were identified, the  
162 remaining members of the corresponding clusters were then selected for additional  
163 experimental characterization. Using this approach, we were able to dramatically reduce the  
164 number of peptides that required screening by approximately 6-fold. Over the course of the  
165 campaign, ~400 peptides were screened experimentally (**Figure 2A, bottom**).

166 *Identification the AMP P297.* The initial screen identified several  $\alpha$ -helical AMPs that  
167 possessed minimum inhibitory concentrations (MICs) of 1-8  $\mu\text{g/ml}$  against two ATCC strains  
168 of *P. aeruginosa*: *P. aeruginosa* ATCC 27853 and *P. aeruginosa* ATCC 39324. Some AMPs  
169 also had broader activity against other bacterial species as well (**Table 1**). However, we noted  
170 that several of these initial AMPs also demonstrated lytic activity against human red blood cells.  
171 One notable exception to this trend was the  $\alpha$ -helical sub-class of the cathelicidin family of  
172 AMPs. Cathelicidins are a family of structurally diverse AMPs that exert potent antibacterial  
173 activity and act as multifunctional effector molecules of innate immunity (22, 23). Results from  
174 multiple sequence variants from this family are outlined in **Table 1**. In particular, one member  
175 of this class, cathelicidin-BF (24), highlighted by one derivative - P297, demonstrated potent  
176 MIC values against multiple *P. aeruginosa* ATCC strains, low hemolytic activity, and a  
177 resistance to killing mammalian cells. Time-course experiments with P297 indicated that at  
178 concentrations of four times the MIC or greater, the peptide was able to rapidly reduce *P.*  
179 *aeruginosa* titers greater than 1000-fold, confirming that the peptide was bactericidal and not  
180 merely bacteriostatic (**Figure 2B**). Consistent with rapid onset of action, activity for P297 in a

## VSX-1/2 Are Potent Bactericidal Antibody-Peptide Conjugates

181 killing assay (see *Materials and Methods*) was higher than in a more traditional MIC assay  
182 ( $EC_{50}$  in the killing assay of 0.14-0.28  $\mu\text{g/ml}$  compared to 2-4  $\mu\text{g/ml}$  in an MIC assay).

183 *Characterization of the AMP P297.* Given its activity profile, we sought to confirm the  
184 overall structure of P297 and ensure that it aligns with the peptide's putative mechanism of  
185 action. To this end, we first employed circular dichroism to analyze the peptide's secondary  
186 structure. Inspection of P297's spectrum indicated that in aqueous solution, P297 did not adopt  
187 appreciable secondary structure, with the minimum at approximately 198 nm corresponding to  
188 the  $\pi$ - $\pi^*$  transition of a random coil (**Figure S1**). However, in the presence of 40% 2,2,2-  
189 trifluoroethanol, a nonpolar solvent that has been used to promote native-like  $\alpha$ -helical  
190 structures in peptides with intrinsic  $\alpha$ -helix



Table 1. *in vitro* Activity and Toxicity of Representative Peptide Variants

| Sample | Sequence                                | MIC ( $\mu\text{g/ml}$ )              |                                       |                                 |                           | Hemolysis   |             | Human Serum | Cytotox                                  |
|--------|-----------------------------------------|---------------------------------------|---------------------------------------|---------------------------------|---------------------------|-------------|-------------|-------------|------------------------------------------|
|        |                                         | <i>P. aeruginosa</i><br>ATCC<br>27853 | <i>P. aeruginosa</i><br>ATCC<br>39324 | <i>E. coli</i><br>ATCC<br>25922 | <i>S. aureus</i><br>29213 | MLC/<br>MIC | PLC/<br>MIC | hsMIC/MIC   | CC <sub>50</sub><br>( $\mu\text{g/ml}$ ) |
| P261   | GGGGIGKFLKKAKKFGKAFVKILKK               | 16                                    | 8                                     | 4                               | 32                        | > 8         | > 8         | 2           | 250                                      |
| P265   | GGGLLGDFFRKSKEKIGKEFKRIVQRIKDFLRNLPRTES | 32                                    | 16                                    | 32                              | > 128                     | > 4         | 1           | > 4         | 90                                       |
| P267   | GGGGRFKRFRKKFKKLFKKLSPVIPLLHLG          | 4                                     | 4                                     | 4                               | 16                        | > 32        | > 32        | 0.5         | 70                                       |
| P271   | GGGGLRKRLRKFRNKIKEKLLKIGQKIQGLLPKLA     | 16                                    | 8                                     | 4                               | 16                        | > 8         | 4           | 2           | 250                                      |
| P292   | GGGHTASDAAAAAALTAANAAAAAASMA            | > 128                                 | > 128                                 | > 128                           | > 128                     | ND          | < 1         | ND          | 250                                      |
| P293   | GGGLRRLGRKIAHGKIKYGPTILRIIRIAG          | 8                                     | 2                                     | 4                               | 4                         | 16          | 4           | 4           | 70                                       |
| P294   | GGGRGLRRLGRKIAHGVKKYGPTVLRRIKKYG        | 64                                    | 2                                     | 4                               | 4                         | > 2         | > 2         | 1           | 120                                      |
| P295   | GGGGRFKRFRKKFKKLFKKLSPVIPLLHLG          | 4                                     | 4                                     | 4                               | 16                        | > 32        | > 32        | 1           | 95                                       |
| P296   | GGGKRFKFFKLLKNSVKKRAKFFKKPRVIGVSIPF     | 4                                     | 2                                     | 4                               | 16                        | > 32        | 32          | NA          | 400                                      |
| P297   | GGGKFFRKLKKS VKKRAKEFFKKPRVIGVSIPF      | 4<br>(1.0)                            | 2 (0.5)                               | 4 (1.0)                         | 32<br>(8.3)               | > 32        | > 32        | 2           | 780                                      |
| Ctl.   | Ceftazadime                             | 1<br>(1.8)                            | 1 (1.8)                               | 0.25<br>(0.5)                   | 4 (7.3)                   | 16          | 8           | 1           | 550                                      |

MIC, minimum inhibitory concentration, numbers in parentheses are molar equivalents; MLC, mean lytic concentration; PLC, partial lytic concentration; hsMIC, MIC in human serum; CC<sub>50</sub> is the concentration at which 50% cytotoxicity of mammalian cells is observed; ND, not determined; NA, no activity in human serum.

## VSX-1/2 Are Potent Bactericidal Antibody-Peptide Conjugates

192 forming properties and represents, to a certain extent, the hydrophobic environment of the  
193 lipid membrane, there is a strong maximal signal at 196 nm, indicative of  $\alpha$ -helix formation.

194 Additional mechanistic studies confirmed that P297 likely works through membrane  
195 disruption (**Figure 2C**, calcein leakage). In this case, model membranes were created with  
196 DOPE/DOPG liposomes and loaded with calcein, as a reporter (25). When liposomes were  
197 subjected to P297, there was rapid disruption of the lipid layer, resulting in release of dye, as  
198 measured by fluorescence. This release was concentration dependent; furthermore, time-course  
199 studies indicated that membrane disruption was rapid, reaching completion <45 minutes.

200 In addition to the above structure-activity studies, we sought to understand the impact of  
201 P297 administration on *P. aeruginosa*, in particular, the ability of the organism to develop  
202 resistance to it. Resistance assessment was conducted by two different methods (see *Methods*).  
203 For both methods, we compared the frequency of emergent resistance to P297 to that of  
204 polymyxin B (colistin). For P297, we noted similar or lower frequency of mutations, on the  
205 order of  $10^{-8}$  to  $10^{-10}$ , for P297 compared to polymyxin B (**Figure 2D**). During our resistant rate  
206 determination assays with P297, a mutant strain was isolated which demonstrated significant  
207 resistance as determined in killing assays and MIC determinations (**Figure 2E**).

208 Mutations that confer antibiotic resistance often involve modifications of the bacteria which  
209 can lead to sub-optimal biological functions in the cell. To test if there was such a fitness cost  
210 associated with acquisition to the resistance to P297, a competitive fitness assay was run  
211 between the wild type *P. aeruginosa* ATCC 27853 and its mutant resistant strain. Briefly, we  
212 mixed  $10^6$ ,  $10^5$ , and  $10^4$  of each strain. At 24 hours, we plated 50  $\mu$ l of serial dilutions of the  
213 mixed cultures onto blood agar plates to determine CFU/ml (see the methods section for more  
214 details). We found that the relative fitness value for the resistant strains was 0.855, comparing  
215 favorably to values reported for resistant strains to the majority of antibiotics, where a

## VSX-1/2 Are Potent Bactericidal Antibody-Peptide Conjugates

216 significant fitness cost was associated with a mean fitness value of 0.88 for resistant mutants  
217 (26).

218 Finally, we interpreted the mechanistic and resistance studies in the context of  
219 specificity, which is critical to the ultimate ADC construct. To this end, P297 exhibited a  
220 relatively high specificity, or therapeutic index, in our *in vitro* assays. One key metric that we  
221 employed, and that previously has demonstrated to be a sensitive assay of toxicity is red blood  
222 cell (RBC) hemolysis (27). For this assessment, we employed both the mean lytic concentration  
223 (MLC), that is, the concentration of peptide that induced 100% hemolysis as well as the minimal  
224 concentration at which red blood cell hemolysis is first observed (defined as partial lytic  
225 concentration, PLC). With both measurements, the levels of P297 at which RBC hemolysis was  
226 observed were 10-fold greater than the MIC. Furthermore, the cytotoxicity of P297 to the  
227 representative mammalian cell 293T was approximately 200-fold greater than the MIC.

228 These results, taken together, confirm that P297 is (i) an  $\alpha$ -helical, bactericidal peptide that  
229 is able to rapidly kill *P. aeruginosa*, (ii) that it has a relatively high barrier to resistance  
230 development, (iii) that a fitness cost was associated with acquisition of the resistance to the  
231 AMP finally (iv) P297 had a therapeutic index. Therefore, P297 was selected for further peptide  
232 design.

233 *Improvement of P297 and selection of D297.* Further analysis of P297 indicated that, while  
234 it is highly active and specific *in vitro*, in the presence of human or mouse serum the activity of  
235 P297 decreased substantially over time (**Figure S2**). LC-MS analysis of P297 in the presence  
236 of serum demonstrated that the peptide was likely adsorbing to serum components, presumably  
237 proteins, and was also being cleaved by serum proteases - its measured half-life was on the  
238 order of 20 minutes. Therefore, we set out to modify the properties of P297 to make it more  
239 amenable to long exposure times *in vivo*, especially given that antibody levels can be sustained  
240 for days. As a first modification, we replaced the L-amino acids of P297 (which adopts a right-

## VSX-1/2 Are Potent Bactericidal Antibody-Peptide Conjugates

241 handed helix) with D-amino acids (**D297**), a substitution which has been shown previously to  
242 decrease protease sensitivity and increase serum stability of peptides (28, 29). Circular  
243 dichroism analysis of D297 confirmed that it adopted a left-handed helix in the presence of  
244 2,2,2-trifluoroethanol. *In vitro* analysis of D297 indicated that it possessed equivalent potency  
245 against *P. aeruginosa* compared to P297 with the added benefit that the D-version was stable  
246 in serum (**Figure S2**). As with P297, D297 had low hemolytic and cytotoxic activity,  
247 demonstrating specificity for bacterial membranes. Thus, by converting to the D-peptide  
248 sequence we were able to retain bactericidal activity, enhance serum stability and preserve the  
249 lack of hemolytic and cytotoxicity of the AMP. Finally, we confirmed that the D297 peptide  
250 had activity against an MDR strain of *P. aeruginosa*. For this assessment, *P. aeruginosa* strain  
251 ATCC 2108 was selected; this strain has resistance to most carbapenems and cephalosporins  
252 and intermediate resistance to third generation fluoroquinolones. Despite its resistance profile,  
253 D297 demonstrated equivalent activity in the MIC assay of 4 µg/ml.

254 *Construction of VSX conjugates.* Having selected VSX as antibody and D297 as AMP,  
255 we aimed to produce and test multiple antibody-drug conjugate (ADC) constructs of VSX-  
256 D297, using an enzymatic ligation strategy employing Sortase A (SrtA, **Figure 3A**). The SrtA  
257 method (30) involved recombinantly expressing VSX with a SrtA-ligatable tag and then  
258 enzymatically coupling the tagged VSX with the chemically synthesized D297 (30). Antibody  
259 conjugates, ADCs, were produced as either C-terminal variants of the heavy chain (HC), or  
260 light chain (LC) or both chains (dual). Conjugates with HC or LC attachment had a drug-to-  
261 antibody ratio (DAR) of ~2 (greater than 1.8 as assessed experimentally by mass spectrometry)  
262 or ~4 (greater than 3.6 as assessed experimentally by mass spectrometry) for the dual conjugate  
263 (**Figure S3**). For quality control purposes, our produced ADCs were all analyzed by mass  
264 spectrometry (LC-MS), SDS-PAGE and SE-HPLC. The couplings were efficient, routinely  
265 converting at > 90% per site as determined by LC-MS. D297 was attached in all cases with a

## VSX-1/2 Are Potent Bactericidal Antibody-Peptide Conjugates

266 30 amino acid (GS)<sub>15</sub>- linker, to maintain flexibility, between the terminal HC/LC residue and  
267 the sortase signal sequence. As a consequence to this flexibility, SE-HPLC analysis showed a  
268 homogenous product with no signs of aggregation (**Figure 3B**). This was considered as  
269 important, as the risk of aggregation is a common concern with ADCs.

270

271 *In vitro killing and therapeutic index of the ADC VSX-1.* Using the VSX antibody, a  
272 series of ADC constructs were evaluated *in vitro* for direct bactericidal activity against *P.*  
273 *aeruginosa*. From these initial constructs, we were able to conclude the relative order of activity  
274 for the sites of conjugation to be (HC + LC) > HC > LC. The most potent ADC, hereafter  
275 referred to as VSX-1, contained the VSX antibody and a DAR of four with AMP D297 ligated  
276 to the C-terminus of each HC and LC (HC+LC). VSX-1 exhibited potent bactericidal activity  
277 in a killing assay against two ATCC strains of *P. aeruginosa* (**Figure 3C**). Consistent with the  
278 results obtained with D297, VSX-1 had a high therapeutic index with minimal hemolytic  
279 activity and negligible cytotoxic activity against 293T cells (**Figure 3D**). To confirm the  
280 maintenance of each component within the ADC, the activity of the antibody, the peptide, and  
281 VSX-1 was assessed in a mix culture of *P. aeruginosa*, *E. coli* and *K. pneumoniae* (**Figure S4**).  
282 Consistent with its activity profile the P297 AMP alone (**Figure S4, left panel**) showed no  
283 specific killing with killing detected for both *P. aeruginosa* and *E. coli*. Consistent with its  
284 requirement of the presence of complement or PMNs, the antibody alone exhibited no killing  
285 (**Figure S4, panel in the middle**). In contrast to both the AMP and the antibody, the ADC  
286 specifically killed *P. aeruginosa* (**Figure S4, right panel**).

287

288 *Other in vitro properties of VSX-1.*

289 (i) *The OPKA (opsonophagocytic killing assay).* The killing properties of the ADC were also  
290 evaluated in an OPKA to confirm intactness of the antibody. The ADC was highly active at 10

## VSX-1/2 Are Potent Bactericidal Antibody-Peptide Conjugates

291  $\mu\text{g/ml}$ , resulting in a 10-fold bacterial reduction in the presence of heat-inactivated complement  
292 and greater than 1000-fold killing activity with non-heat inactivated complement, in the  
293 presence of polymorphonuclear neutrophils. As with OPKA assessment of VSX, the strain *P.*  
294 *aeruginosa* PAO1 was used (17). **(ii) Synergy with antibiotics.** Given that VSX-1 acts at the  
295 outer membrane of *P. aeruginosa*, we reasoned that it may demonstrate synergy with existing  
296 antibiotics, which must cross the double membrane to target intracellular targets. Indeed, we  
297 find that VSX-1 appears to increase the potency of classical anti-*Pseudomonas aeruginosa*  
298 antibiotics (*e.g.* carbapenems and polymyxin B) with a 10-fold reduction of the MIC or more  
299 (**Figure 4**). Indeed, we found that an increasing amounts of VSX-1 from 0.015 to 4  $\mu\text{g/mL}$   
300 lowered the observed MIC for meropenem from 0.5 to  $<0.1 \mu\text{g/ml}$  and that of colistin from  $\sim 1$   
301  $\mu\text{g/ml}$  to  $<0.1 \mu\text{g/ml}$  (**Figure 4**). This result is likely caused by the AMP increasing the outer  
302 membrane permeability. **(iii) LPS-mediated TLR4 activation inhibition.** Finally, other  
303 additional mechanisms of protection that could be mediated by VSX were also explored.  
304 Specifically, it has been reported that shedding of LPS may cause pathophysiological  
305 manifestations upon hyperstimulation of the host immune system – initiated by activation of  
306 toll-like receptors (TLRs) which, in turn, can lead to septic shock (31). Given this  
307 pathophysiology, an anti-LPS antibody could play a vital role in neutralizing LPS by limiting  
308 LPS shedding, promoting its serum clearance and inhibiting the LPS-mediated binding to TLR  
309 and concomitant activation of the immune system. Consistent with this pathway as well as the  
310 binding site of VSX, a HEK-blue reporter assay that measures the activation of TLR4 receptor  
311 by free LPS demonstrates that VSX inhibits LPS-mediated TLR4 activation (**Figure S5**).

312

313 *In vivo* activity of VSX-1 in animal models of infections caused by *P. aeruginosa* strains.

314 To investigate the *in vivo* activity of VSX-1, we focused on lung infection models for  
315 several reasons. First, the lung is a common site for *P. aeruginosa* infection, leading to

## VSX-1/2 Are Potent Bactericidal Antibody-Peptide Conjugates

316 community/hospital-acquired pneumonia, which is associated with problematic outcomes, with  
317 high mortality rates, up to 30-60% in some studies (32). As such, it presents one area of likely  
318 clinical use for a pathogen-specific ADC. Second, given the compartmentalization of the lung  
319 from the bloodstream, it also represents a high bar to demonstrate efficacy for a systemically  
320 administered antimicrobial.

321 Consistent with the *in vitro* data, VSX-1 demonstrated *in vivo* efficacy in multiple  
322 animal models of *P. aeruginosa* infection. A murine neutropenic lung infection model using *P.*  
323 *aeruginosa* (ATCC 27853) was previously described (33) and was initially employed to explore  
324 the proof of concept that our ADC VSX-1, an antibody based therapeutic, would work *in vivo*  
325 even in an immunocompromised host because it is conjugated to another antimicrobial agent.  
326 Infected animals were treated intranasally with VSX-1 construct resulting in statistically  
327 significant reduction in the bacterial load in the lung both when co-administered (**Figure 5A**)  
328 and when dosed therapeutically (**Figure 5B**). Notably, antibody alone showed no bacterial  
329 reduction, supporting the selection of an ADC with direct bactericidal activity as a preferred  
330 mechanism, particularly in an immunocompromised setting. Building on this initial data, VSX-  
331 1 was evaluated in a murine immunocompetent model (**Figure 5C**) using the same approach  
332 that we previously reported and that we also used in this study when testing the antibody VSX  
333 alone (**Figure 1B**): the acute lung infection model with the *P. aeruginosa* strain PA14 (4).  
334 While VSX alone was able to significantly protect the infected mice, the survival of infected  
335 animals treated three hours post-infection with a single intraperitoneal dose of VSX-1 at 15  
336 mg/kg (**Figure 5C**) was more pronounced ( $P=0,04$  and  $P=0,007$  respectively).

337 The immunocompetent model used for this experiment is aggressive, with  $\geq 50\%$  of  
338 control animals succumbing to infection within 24 hours of inoculation. To confirm the  
339 contribution of the antibody component of VSX-1, a sham-conjugate was prepared using a non-  
340 *P. aeruginosa* targeting antibody (actoxumab, an human monoclonal antibody against

## VSX-1/2 Are Potent Bactericidal Antibody-Peptide Conjugates

341 *Clostridioides difficile* (34)). The actoxumab-D297 conjugate showed no survival benefit in the  
342 immunocompetent lung infection model, validating the selection of a *P. aeruginosa* surface-  
343 targeting antibody. In all, the protection observed with the VSX-1 conjugate was highly  
344 encouraging and warranted the further exploration of this ADC as a potential treatment for *P.*  
345 *aeruginosa* lung infection.

346 *Optimization of the ADC: VSX-2.* The promising first generation VSX-1 construct was  
347 further evaluated *in vivo*. Despite complete protection in *P. aeruginosa* infection models, we  
348 noted that VSX-1 displayed somewhat compromised biodistribution in mice relative to the  
349 parent antibody (**Figure 6A**). Based on previous studies with ADCs, the AMP properties and  
350 DAR have been shown to lead to compromised bioavailability *in vivo* with similar constructs  
351 (35). Indeed, we find that a DAR of two with the AMP D297, while not as potent, demonstrates  
352 improved bioavailability in the mouse with increased circulating levels after 1h, 24h and 72  
353 hours post-administration, compared to VSX-1 (**Figure 6B**). This observation carried though  
354 to other compartments as well, with increased bioavailability in the lung after 1h (**Figure 6C**  
355 top left panel for VSX-DAR2, **Figure 6A** middle top panel for VSX-DAR4).

356 Therefore, to optimize the biodistribution properties of VSX conjugates as a potential  
357 therapeutic, we carried out a focused set of studies on AMP charge, AMP hydrophobicity and  
358 DAR. Starting from the P297 sequence, we screened a set of charge variants and variants with  
359 globally reduced hydrophobicity. Unexpectedly, L-P369  
360 (GGGKLLRKLKKS VKKRAKELLKKPRVIGVSIPL), containing 5 phenylalanine to leucine  
361 substitutions, emerged as a more potent peptide and, when conjugated to the VSX antibody,  
362 retained bactericidal activity and demonstrated little cytotoxicity to mammalian cells (**Figure**  
363 **7A**). As with D297, P369 (containing either D- or L-amino acids) demonstrated potent MIC  
364 activity across several *P. aeruginosa* strains, including the MDR ATCC strain 2108 (MIC = 8  
365  $\mu\text{g/ml}$ ). Indeed, VSX-2, containing a DAR of 2 with AMP D-369 ligated to the C-terminus of



## VSX-1/2 Are Potent Bactericidal Antibody-Peptide Conjugates

366 each HC, also demonstrated protection in the *P. aeruginosa* lung infection model (**Figure 7B**).  
367 Thus, it appears that we can modify both the activity and the PK characteristics of the ADC  
368 through modification of the peptide characteristics and the DAR.

369 Finally, *P. aeruginosa* is also responsible of chronic infections, for instance in Cystic  
370 Fibrosis patients (lung infections) or in wound infections for example. In these chronic  
371 infections, the treatment is often complicated by the production of biofilm by *P. aeruginosa*.  
372 Therefore, as a last step we also tested the activity of our ADC VSX-2 against biofilm grown  
373 *P. aeruginosa* both in an inhibition/prevention setup, but to also against mature biofilms  
374 (eradication/treatment setup, **Figure 8**). We used a dynamic model with continuous and very  
375 low flow of minimal medium with *P. aeruginosa* biofilms grown for 48 hours, at 37°C in flow  
376 chambers. While VSX-2 applied 24h after formation of a dynamic biofilm was able to totally  
377 eradicate *P. aeruginosa*, the efficacy of the treatment decreased overtime (**Figure 8A-B**).  
378 Prevention of biofilm by our ADC (injection of VSX-2 in the flow cell system during bacterial  
379 inoculation) was highly successful in our model (**Figure 8 C-D**)

380

381 The results of this study taken together, report a new approach to treat bacterial  
382 infections, including infections caused by multi-drug resistant strains through the use of an  
383 Antibody-Drug conjugate, ADC, which can act at the outer membrane of Gram negative  
384 organisms, specifically *P. aeruginosa*. Our selected antibody targets a conserved glycan  
385 structure on the surface of *Pseudomonas aeruginosa* (13). It has been engineered in an ADC  
386 format to have direct bactericidal activity. Notably, unlike ADCs that have been constructed for  
387 oncology indications (36) and recently for Gram-positive organisms (37), internalization and  
388 release of the AMP is not required for activity: we present here construction of an ADC that  
389 acts exclusively at the outer membrane surface. The resulting ADC demonstrates significant *in*

## VSX-1/2 Are Potent Bactericidal Antibody-Peptide Conjugates

390 *in vitro* activity against a variety of strains of *P. aeruginosa* and has demonstrated *in vivo* efficacy  
391 in an aggressive lung infection model.

392 While these data demonstrate initial proof-of-concept that an ADC approach can work  
393 for a Gram negative organism, there are some limitations to this study. First, while preliminary  
394 work has indicated that the frequency of bacterial resistance to the peptides and ADCs is low  
395 ( $\sim 10^{-8-10}$ , roughly equivalent with colistin), additional work will be required to further  
396 characterize such resistant mutants. Second, while the biodistribution of the VSX-1 ADC is  
397 sufficient to exhibit *in vivo* activity and is significantly improved with the redesigned VSX-2,  
398 neither construct exhibited biodistribution or PK that is comparable to the antibody alone. .  
399 Finally, additional studies and other ADC constructs are required to identify whether other  
400 Gram negative organisms, beyond *Pseudomonas* can be targeted with such an approach.

401 Overall, with our ADC strategy, we augment the bactericidal activity of specific  
402 antibodies. By bringing together two optimized components, a specific human anti-*P.*  
403 *aeruginosa* antibody and an optimized antimicrobial peptide, the resulting ADC has therapeutic  
404 properties superior to either component alone. The data and approach presented here offer an  
405 alternative strategy for the development of antimicrobials that complements existing and  
406 ongoing efforts in small molecules and biologics (38).

407

### 408 **Materials and Methods**

409 *P. aeruginosa* strains. All strains used in the study and their origin are listed table S1.

410 *VSX Antibody*. The fully humanized antibody, VSX, has been identified to target the  
411 inner core of *P. aeruginosa* LPS, specifically the phospho-diheptose. A complete description  
412 of this antibody is presented in Elli, *et. al.* (13).

413 *Sortase Tagging*. A sortase A recognition sequence (LPETGGSG) was placed at the C-  
414 termini of either the heavy chain ( $\text{DAR}_{\text{theoretical}} = 2$ ) or both the heavy and light chains

## VSX-1/2 Are Potent Bactericidal Antibody-Peptide Conjugates

415 (DAR<sub>theoretical</sub> = 4) of the VSX monoclonal antibody. Prior to ligation, the VSX antibody was  
416 buffer exchanged from 1x PBS into sortase buffer (150 mM NaCl/50 mM Tris, pH 7.5) using  
417 30 kDa spin diafiltration units (Amicon Ultra 15). Sortase A was from BPS Bioscience (San  
418 Diego, CA). VSX was ligated with the transpeptidase enzyme and a GGG-sortase donor peptide  
419 (added to the reaction as an aqueous solutions at 10 or 20 mg/ml), thereby replacing the GGSG  
420 sequence on the antibody with full length peptide. Ligations were performed in sortase buffer  
421 using 20 mol of peptide per mol VSX antibody (which was at 1.5 mg/ml), 10 mM CaCl<sub>2</sub>, 5.8  
422 µg/ml Sortase A. Samples were kept in the dark at room temperature for 18 hours, followed by  
423 quenching via dilution to 10 ml total volume in PBS and immediate purification by Protein A  
424 FPLC. Conjugation efficiency was determined by Q-TOF mass spectrometry using a reduced  
425 antibody prepared by heating 5 µg of sample at 65 °C for 15 min in 10 mM DTT.

426 *SEC-HPLC.* VSX and VSX conjugate were dissolved at 1 mg/ml and 10 µl were injected  
427 onto a BioSep SEC-s3000 Phenomenex column (300 x 7.8 mm) run @ 1 ml/min in 0.1M  
428 NaH<sub>2</sub>PO<sub>4</sub> buffer at pH 3 on an Agilent 1100 series system with 214 nm UV monitoring.

429 *Assessment of Peptide AMP Stability in Serum.* Normal human serum (NHS) (Sigma S-  
430 7023) was thawed, diluted in water, centrifuged at 13,600 x g for 10 minutes and the supernatant  
431 was warmed to 37 °C in a water bath. Twenty microliters of each test article were placed in a  
432 2.0 ml round bottom microfuge tube. Two milliliters of diluted NHS were added to each tube  
433 which was immediately vortexed, followed by transfer of 200 µl to a fresh microfuge tube  
434 placed at 37 °C in a rotating rack. Samples were harvested and processed at various time-points  
435 up to 6 hours by quenching with 40 µl of 15% trichloroacetic acid (TCA), chilling on ice for 15  
436 minutes, centrifuging at 13,600 x g for 10 minutes and storing the supernatant at -20 °C until  
437 analysis.

438 *Assessment of Antimicrobial Activity.*

439 MICs and a Killing Assay were performed in this study.

## VSX-1/2 Are Potent Bactericidal Antibody-Peptide Conjugates

440 MICs were determined according to CLSI guidelines, using 2-fold serial compound dilutions,  
441 in 96-well microtiter plates. Briefly, compounds were diluted in water across a mother plate  
442 then 2  $\mu$ l was stamped to assay plates, one plate for each strain to be tested. Bacterial strains  
443 were sub-cultured overnight on agar plates at 37 °C. Overnight plates were used to prepare 0.5  
444 McFarland cultures in 0.85% saline. These concentrated cultures were diluted 1:200 in growth  
445 media to approximately  $5 \times 10^5$  cells/ml. All assay plates received 100  $\mu$ L diluted culture per  
446 well. All plates were placed at 37 °C overnight. After 18 hours, the plates were assessed using  
447 a mirrored plate reader and reflected incandescent light. The MIC is defined as the lowest  
448 concentration of compound that inhibits growth by at least 80%. Wells at and above the MIC  
449 should appear void of growth when visualized.

450 To assess microbial killing (*killing assay*), bacterial cells were grown aerobically  
451 overnight on agar plates at 37 °C. Overnight plates were used to seed 30 ml cultures of growth  
452 media in 250 ml vented flasks. Cultures were grown aerobically at 37 °C, shaking at 150 rpm.  
453 Growth was monitored at  $A_{600}$  and bacterial cells were harvested at mid-log growth. Ten  
454 milliliters of culture were pelleted at 4000  $\times g$  for 10 minutes and washed one time with PBS +  
455 1% BSA (PBSA) before re-suspending in 2 ml PBSA. The concentrated culture was used to  
456 seed 6 ml tubes of PBSA to an OD giving a concentration of  $1 \times 10^8$  cells/ml. Cultures were  
457 diluted to  $1 \times 10^4$  cells/ml in PBSA. Test articles were diluted in PBSA and 50  $\mu$ L per  
458 concentration tested was loaded into a 96 well polypropylene microtiter plate. Fifty microliters  
459 of diluted culture were added to all test wells and no compound control wells. Plates were  
460 shaken and then incubated at 37 °C, 90 minutes, under static conditions. Ten microliters from  
461 each assay well was plated onto agar plates and incubated at 37 °C overnight. Percent killing  
462 was determined by the CFU for test wells compared to the CFU for no compound control wells.  
463 The  $EC_{50}$  reported is the lowest concentration of a compound which causes > 50% colony  
464 reduction compared to the no compound control for the strain being tested.

## VSX-1/2 Are Potent Bactericidal Antibody-Peptide Conjugates

465 *RBC Hemolysis.* Test articles are diluted 2-fold in water across a 96 well polypropylene  
466 mother plate leaving one no compound control. Two  $\mu\text{l}$  from each well is stamped onto a 96  
467 well polystyrene assay plate. A red blood cell suspension is made by mixing 0.2% defibrinated  
468 sheep blood (Hardy Diagnostics DSB100) in PBS. All assay plates received 100  $\mu\text{l}$ /well of the  
469 red blood cell suspension. Plates are then incubated at 37 °C overnight. The titer for RBC  
470 hemolysis was defined as the lowest concentration of compound that completely prevented the  
471 formation of a red blood cell pellet perceptible by eye.

472 *Mammalian Cell Cytotoxicity.* On day one, cells from an established 293T human cell  
473 line are seeded onto 96 well flat bottom white plates with 10,000 293T cells/well. On day two,  
474 dilution plates are prepared by diluting compound in cell growth media to two times the final  
475 starting concentration and then carrying out serial doubling dilutions across the plate. Media  
476 from the cell growth assay plates is then aspirated and 50  $\mu\text{l}$  from the compound dilution plates  
477 is transferred to the assay plates. 50  $\mu\text{l}$  of fresh media is then added to all wells of the assay  
478 plate. Plates are incubated at 37 °C, 5% CO<sub>2</sub> for three days. Then, CellTiter Glo (Promega  
479 G7570) is reconstituted and mixed 50:50 with growth media. Media from the assay plates is  
480 aspirated and 100  $\mu\text{l}$  of the CellTiter Glo/growth media mix is added to all wells. After five  
481 minutes, luminescence is read and % inhibition vs. compound concentration is plotted. The  
482 CC<sub>50</sub> is defined as the cytotoxic concentration reducing viable cell number by 50% compared  
483 to cells in media lacking the test article.

484 *LPS Neutralization.* A cell-based LPS neutralization assay was developed and  
485 optimized. HEK-Blue LPS detection Kit2 (Invivogen) was used to investigate the ability of  
486 VSX to neutralize endotoxin activity of extracted *P. aeruginosa* LPS in HEK-Blue cells.  
487 Endotoxin, if present in the media or standard are sensed by TLR4 leading to the activation of  
488 NF- $\kappa$ B and the concomitant production of SEAP in the supernatant. When supernatant is  
489 combined with QUANTI-Blue, which contains a SEAP chromogenic substrate, a purple/blue

## VSX-1/2 Are Potent Bactericidal Antibody-Peptide Conjugates

490 color appears and can be quantified by measuring the absorbance at 620-655 nm and  
491 extrapolating against a standard curve. Endotoxin units (EU) of 0.5 EU/ml were used to define  
492 the LPS concentration added alone or pre-mixed with VSX (0.185 - 10  $\mu$ M) and activation of  
493 the NF- $\kappa$ B was assessed. The monoclonal antibody CDA1 does not target bacteria and was used  
494 as a control in the neutralization assays

495 *Mixed Microbial Assay.* Bacterial strains were grown overnight on agar plates at 37 °C.  
496 Overnight plates were used to establish 0.5 McFarland Cultures in 6 ml PBS (approximately 1  
497  $\times 10^8$  cells/ml). Concentrated cultures were diluted to 1  $\times 10^4$  cells/ml in PBS. Ten microliters  
498 of each of the diluted cultures were plated onto blood agar plates (BAPs) to determine initial  
499 concentration, check for purity, and establish strain morphology. One milliliter of each diluted  
500 culture was combined (for a total of three) and the volume was brought to 10 ml with PBS (1  $\times$   
501  $10^3$  cells/ml of each strain). Twenty-five microliters of the mixed culture was spread on a BAP  
502 to establish the CFUs/ml for each strain at t=0. Test articles were serially diluted 4-fold in PBS  
503 with a final volume of 200  $\mu$ l in 2 ml round bottom Eppendorf tubes. A no compound control  
504 was included. Two hundred microliters of mixed bacterial culture was added to all assay tubes.  
505 Tubes were vortexed and immediately 50  $\mu$ l from each tube was spread on separate BAPs.  
506 Assay tubes were incubated at 37 °C, rotating between timepoints. The plating procedure was  
507 repeated at 1 hour intervals for two hours and all plates were incubated at 37 °C overnight. The  
508 following day all plates were counted, noting the CFU for each strain, distinguished by different  
509 morphology, and results were plotted as the percentage killed compared to a no compound  
510 control.

511 *Resistance Assessment by MIC.* Resistance assessment to D297 was assessed using two,  
512 complementary methods. The first, standard protocol involves plating a high-density culture on  
513 selective plates that are at various multiples of the MIC for D297 and, as a reference, colistin.  
514 Overnight cultures were brought to an OD of 3.0 at an absorbance of 600nm ( $10^9$  - $10^{10}$

## VSX-1/2 Are Potent Bactericidal Antibody-Peptide Conjugates

515 CFU/ml). 100ul of concentrated culture was plated in quadruplicate onto selective plates  
516 containing compound at 2, 4, and 8 x MIC. Additionally, 100ul of  $10^{-7}$ ,  $10^{-8}$ , and  $10^{-9}$  serial  
517 dilutions of the concentrated cultures were plated in quadruplicate on non-selective plates to  
518 calculate CFU/ml. All plates were incubated at 37C and counted at 24 and 48 hours. Resistance  
519 rates were calculated. Colonies growing at 2 x MIC and higher were re-plated on selective  
520 plates to confirm resistance.

521 Secondly, resistance to peptide D297 was determined using the Pranting protocol's  
522 micro-dotting procedure (39). Solid phase Minimal Inhibitory Concentrations (MICs) for test  
523 articles on Tryptic Soy Agarose plates were determined by plating 100  $\mu$ l of a bacterial culture  
524 with  $> 1 \times 10^9$  CFU/ml onto selective plates containing test compound at concentrations equal  
525 to various multiples of a broth MIC previously determined using CLSI standards. The  
526 concentration of the plate leading to an 80% reduction of CFU/ml compared to a no compound  
527 control plate defined the solid phase MIC. Selective Tryptic Soy Agarose plates were prepared  
528 at concentrations of 0, 2, 4, and 8 times the solid phase MIC for D297 and, as a reference,  
529 colistin. Bacterial test strains were grown overnight, rotating at 37° C in 40 separate 10 ml  
530 Pyrex screw-capped tubes containing 3 mls Mueller Hinton Broth II, cation adjusted (MHB).  
531 Overnight cultures were spun down and re-suspended in Tryptic Soy Broth (TSB) to a density  
532 of approximately  $4.8 \times 10^9$  CFU/ml as determined by densitometer. Serial dilutions of  
533 representative cultures were plated to confirm cell concentrations. All cultures were plated on  
534 selective and non-selective plates by dropping 5  $\mu$ l of culture onto agarose plates and letting  
535 the drops absorb. Plates were incubated at 37° C overnight. The mutation rate was calculated  
536 using the  $P_0$  method,  $-\ln(P_0/P_{tot})/N$ , where  $P_0$  is the number of cultures (spots) with no mutants,  
537  $P_{tot}$  is the number of cultures, and N is the number of bacteria applied in each spot..

538 *Generation of Resistant Mutants*



## VSX-1/2 Are Potent Bactericidal Antibody-Peptide Conjugates

539 Plates generated during resistance assessment using both the standard and Pranting protocols  
540 (above) were used to isolate mutant strains of *P. aeruginosa* 27853 with elevated MICs to  
541 peptide D297. One colony from the standard protocol and 5 colonies from the Pranting  
542 protocol grew at 4 x the agarose MIC for wild type *P. aeruginosa* 27853. These six colonies  
543 were picked and mixed with PBS. 5 ul drops containing approximately 2-4E+08 cells were re-  
544 plated onto D297 selective plates (1 - 4 x MIC), colistin selective plates (0.5 - 4 x MIC), and  
545 non-selective plates to determine if the mutations confer true resistance and if any cross-  
546 resistance to Colistin has been created. Plates were incubated at 37C overnight. Of the six  
547 potential mutants, 4 confirmed growth at 2 x the MIC and 1 confirmed growth at 4 x MIC on  
548 D297 selective plates. Only one of the 6 isolates grew at 2 x MIC on Colistin selective plates.  
549 Wild type control strains had no growth at 2 x MIC for either D297 or Colistin.

### 550 *Competitive Fitness Assay*

551 A competitive fitness assay was run with the wild type *P. aeruginosa* 27853 and the resistant  
552 mutant strain. Both isolates were grown overnight on agar plates, followed by growing both  
553 plated strains independently for 24 hours in 35 mls MHB in flasks. Overnight cultures were  
554 used to make 0.5 McFarland cultures using a densitometer. 50 ul of each 0.5 McFarland  
555 culture was plated onto blood agar plates. Cultures were then mixed so that 3, 30 ml cultures  
556 in flasks would have approximately 1E+06 of each cell type (1:100 dilution), 1E+05 of each  
557 cell type (1:1,000 dilution), and 1E+04 of each cell type (1:10,000 dilution). At 24 hours, we  
558 plated 50 ul of serial dilutions of McFarland cultures and mixed cultures onto blood agar  
559 plates to determine CFU/ml. All plates were at 37C overnight. The following day, we counted  
560 all plates for CFU/ml then re-plated the mixed bacterial flasks by diluting each mixed culture  
561 to 0.5 McFarland, diluting to 1E+05 cells/ml and plating 50 ul of the diluted cultures onto  
562 blood agar plates. All plates at 37C overnight then read for CFU/ml.



## VSX-1/2 Are Potent Bactericidal Antibody-Peptide Conjugates

563 To determine whether there was a phenotypic difference between wild type *P. aeruginosa*  
564 strain ATCC 27853 and its resistant mutant, both strains were plated on eight different types of  
565 selective and non-selective agar mediums. On one type of plate (TSA with 5% sheep blood)  
566 there was a discernible difference in the colony morphology between the wild type and mutant  
567 strains, with the later exhibiting a rougher colony morphology, enabling the use of these blood  
568 agar plates for the determination of the relative fitness of the two strains.

569 To assess relative fitness, we used the method of Lenski and colleagues (40) to estimate  
570 the selection coefficient on a genotype,  $s$ , from competition data (where relative fitness is given  
571 by  $1 + s$ ). The growth parameter for a strain is the number of doublings that it experiences over  
572 a given period of time. As such, the selection coefficient on the focal strain is defined as  
573 follows:

574

$$575 \quad s_i = \frac{\text{No. of doublings of focal strain}}{\text{No. of doublings of wild type strain}} - 1$$

576 Note that  $s_i$  is a unitless parameter.

577

578 *Assessment of Serum Stability.*

579 Normal human serum (NHS) (Sigma S-7023) was thawed, diluted in water, centrifuged at  
580 13,600 x g for 10 minutes and the supernatant was warmed to 37C in a water bath. Twenty  
581 microliters of each test article at 10 mg/ml was placed in a 2.0 mL round bottom microfuge  
582 tube. Two milliliters of NHS (25% in dH<sub>2</sub>O) was added to each tube and immediately the  
583 tubes were vortexed and 200 ul was transferred to a fresh microfuge tube with 40 ul of 1%  
584 Trichloroacetic acid (TCA). Assay tubes were placed at 37C in a rotating rack. Additional  
585 samples were similarly harvested and processed at  $t = 30, 60, 120, 240,$  and 360 minutes.  
586 TCA tubes were placed on ice for 15 minutes and then centrifuged at 13,600 x g for 10

## VSX-1/2 Are Potent Bactericidal Antibody-Peptide Conjugates

587 minutes. Supernatant from each tube was collected and frozen at -20C for analysis. Mass spec  
588 analysis was used to quantify the percent of test articles remaining intact.

### 589 *Opsonophagocytic killing assay*

590 Opsonophagocytic Assays were performed in 2.0 ml Eppendorf tubes using a total volume of  
591 400 ul. Four components were added in rapid succession in equal 100 ul volumes: test  
592 articles, bacterial culture, PMNs, and Human complement. Test articles were diluted in GVB  
593 +Ca +Mg (Boston Bioproducts #IBB-300X) and kept on ice until ready for use. Overnight  
594 bacterial cultures were grown in Columbia Broth + 2% NaCl (CSB), 37C, rotating at 250 rpm.  
595 Cultures were diluted to an OD at 650nm = 0.4 in GVB. Cultures underwent a second  
596 dilution, 1:200 in GVB, for a final assay concentration of 1.5E+07 cfu/ml. Human PMN were  
597 isolated with EasySep (StemCell Cat. # 19666) as per protocol from peripheral blood. PMN  
598 were resuspended in GVB to 1E+07/ml (1E+06 PMN/tube). For no PMN control tubes, GVB  
599 was used. Complement used was 20% MN8-absorbed Human C' (single source) in GVB.  
600 Complement underwent further absorption using 200 ul C' with 800 ul of a bacterial  
601 suspension in GVB with an OD at 650nm = 1.0. Absorption performed at 4C, 30 minutes.  
602 Cells were spun out and the process repeated with the supernatant used to resuspend a cell  
603 pellet from 800 ul cell culture. Cells were spun out and the final supernatant was filtered using  
604 0.22um spin filters. Final complement source was 2x absorbed, 20% human complement. A  
605 small aliquot was heat inactivated at 56C, 30 minutes for a no complement control.  
606 Components, as described, were combined and 25 ul from each assay tube was removed for a  
607 t = 0 CFU determination. The assay tubes were capped and placed at 37C for 90 minutes with  
608 end over end rotation. Removed samples were serially diluted 1:10 in TSB/tween and 10ul of  
609 the 1:10 and 1:100 dilutions were plated on TSB blood agar plates allowing for sample to run  
610 down a vertical plate almost to the edge. After the 90 minute incubation the plating procedure

## VSX-1/2 Are Potent Bactericidal Antibody-Peptide Conjugates

611 was repeated. All plates were incubated overnight at 37C and CFU/ml calculations were  
612 performed for t=0 and t=90 minutes.

613

614 *Neutropenic Mouse Model.* Animal experiments were performed in accordance with the  
615 Institutional Animal Care and Use Committee. CD1 Mice were supplied by Charles River  
616 (Margate, UK) and were specific pathogen free. Male mice were 11-15 g on receipt and were  
617 allowed to acclimatize for at least 7 days. Mice were housed in sterilized individual ventilated  
618 cages exposing the mice at all times to HEPA filtered sterile air. Mice were rendered  
619 neutropenic by immunosuppression with cyclophosphamide at 200 mg/kg four days before  
620 infection and 150 mg/kg one day before infection by intraperitoneal (IP) injection. The  
621 immunosuppression regime leads to neutropenia starting 24 hours post administration of the  
622 first injection which continues throughout the study. *P. aeruginosa* strain ATCC 27853 was  
623 used to assess *in vivo* protection. For infection, animals were first anesthetized with a  
624 ketamine/xylazine anesthetic cocktail (90 mg/kg ketamine & 9 mg/kg xylazine) via IP injection  
625 delivered at ~15 ml/kg. Anesthetized mice were infected with 0.04 ml inoculum by intranasal  
626 instillation into mouse nostrils (20  $\mu$ L per nostril, 5-minute interval between each nostril  
627 administration) and were kept in an upright position on a string rack for ~10 minutes post-  
628 infection. The inoculum concentration was  $2.83 \times 10^5$  CFU/ml (~ $1.1 \times 10^4$  CFU total inoculum).  
629 VSX-1 or controls were administered either intranasally (IN) or IP. The clinical condition of  
630 the animals was monitored and animals that succumbed to the disease were euthanized. The  
631 study was terminated ~24.5 hours post-infection when most of the vehicle mice were displaying  
632 significant clinical symptoms, after which the clinical condition of all remaining animals was  
633 assessed. After being euthanized by pentobarbitone overdose, mice weights were determined  
634 before the lungs were removed and weighed. Lung samples were homogenized in ice cold  
635 sterile 1x PBS using a Precellys bead beater; the homogenates were quantitatively cultured onto

## VSX-1/2 Are Potent Bactericidal Antibody-Peptide Conjugates

636 *P. aeruginosa* selective agar and incubated at 37 °C for 16-24 hours before colonies were  
637 counted. Data were analyzed using StatsDirect software (version 2.7.8). The non-parametric  
638 Kruskal-Wallis test was used to test all pairwise comparisons (Conover-Inman) for tissue  
639 burden data.

640 *Acute Lung Infection Model.* The acute lung infection model was performed as  
641 previously described (4) with some minor modifications. Briefly, after general anesthesia (IP  
642 injection using ketamine and xylazine) of C57/BL6 female 6-8 week old mice, 10  $\mu$ L ( $1 \times 10^6$   
643 CFU) of the reference strain *P. aeruginosa* PA14 was inoculated in each nostril to induce an  
644 acute lung infection. The inoculum was prepared from a dilution of an overnight culture of  
645 PA14 grown in Luria Bertani Broth. Mice were monitored over four days and were euthanized  
646 when they showed imminent signs of mortality including ruffled fur, lethargy, shaking, high  
647 respiratory rate, inability to move when touched or inability to right itself after being placed on  
648 its side. For the protection assays, the ADC or the control compound were injected IP at 15  
649 mg/kg three hours after the bacterial challenge. For each experiment there was 5 animal per  
650 group. Experiments were repeated two times with VSX and VSX-1 and five times with VSX-  
651 2.

652 *In vivo Imaging.* CR female NCI Ath/nu mice were placed on Special Diet "RD  
653 D10012Mi" for 7 days prior to study start and for the duration of the study. Animals were  
654 randomized into treatment groups based on Day 1 bodyweight with an age at Start Date of 8 to  
655 12 weeks. VSX was conjugated with IR800 dye (LiCor, Lincoln, NE), then used in sortase  
656 reactions to make VSX-1. A vehicle control (0.9% saline) and a dye alone control group were  
657 also employed. A 5 mg/kg dose was used, and materials were injected by the IV route. Whole  
658 body imaging (dorsal and ventral) was collected at 1, 6, 12, 24, 48, 100 hours post-IV dose.

659

660 *Flow Cells/Biofilm experiments.*

## VSX-1/2 Are Potent Bactericidal Antibody-Peptide Conjugates

661 *P. aeruginosa* biofilm were grown in a dynamic model with continuous and very low flow of  
662 minimal medium (MM) [62 mM potassium phosphate buffer, pH 7.0, 7 mM (NH<sub>4</sub>)<sub>2</sub>SO<sub>4</sub>, 2 mM  
663 MgSO<sub>4</sub>, 10 mM FeSO<sub>4</sub>) containing 0.4% glucose and 0.1% casamino acids].

664 In this dynamic model, *P. aeruginosa* biofilms were grown for 48 hours, at 37°C in flow  
665 chambers (IBI scientific, UK). The system was sterilized by pumping a 0.2 % of hypochlorite  
666 solution for 1 hour using a peristaltic pump. After a sterile water rinsing, MM was introduced  
667 for 1 hour with a rate of 20 mL/h for system stabilization. Bacteria at a concentration of 5.10<sup>8</sup>  
668 CFU/mL were injected in flow cell chambers, which were flipped upside-down, without flow  
669 for 2 hours. The pump was turned on to authorize a constant rate of 0.2 mL/h of MM during 48  
670 hours. For prevention approach, bacteria were inoculated with the VSX-2 (6 µg/mL). For  
671 treatment experiment, we injected VSX-2 (6 µg/mL) for 1 hour at three different times (24h,  
672 30h and 47h). After 48 hours, Live/Dead BacLight bacterial viability kit (Molecular probes) at  
673 a ratio 1:5 of Syto-9 to propidium iodide is injected. Then stained biofilms were observed using  
674 a LMS 710 NLO, confocal laser scanning microscope (Zeiss). Homogeneity of the samples was  
675 checked by traversing the observation field and the most representative area was chosen for the  
676 acquisition of the image. 3D reconstructions and fluorescents volumes were generated using  
677 Imaris software. The experiment was repeated 3 times.

678

679 *Data Availability.* The sequence of the VSX antibody has been deposited in GenBank.  
680 The sequences of the anti-microbial peptides P297 and P369 have also been deposited.

681

## VSX-1/2 Are Potent Bactericidal Antibody-Peptide Conjugates

682 **Acknowledgements.**

683 We thank Dr. Gerald Pier for access to bacterial strains and advice throughout the course of this  
684 research. This work was supported by CARB-X award number: 1 IDSEP160030-01-02.

685 **Competing Interests.** Visterra, Inc. funded significant portions of this work. K.J., J.D., A.W.,  
686 H.T., K.V., and Z.S. are employees of Visterra. O.P. was an employee and K.L. was a contractor  
687 of Visterra when this work was completed.

688

## VSX-1/2 Are Potent Bactericidal Antibody-Peptide Conjugates

### 689 **Figure legends**

690

691 **Figure 1.** In vitro and in vivo activity of the Monoclonal antibody (Mab) VSX targeting *P. aeruginosa*  
692 core LPS.

693 (A) *In vitro* killing of *P. aeruginosa* PA14 mediated in the presence of PMN and Complement (OPKA)  
694 by VSX. The lot#-472 is representative of a Mab able to bind *P. aeruginosa* without any detectable  
695 OPKA. C=Complement. HI C=Heat Inactivated Complement. PMN=polymorphonuclear leukocytes.  
696 Abs=Antibodies. (B) *Acute lung infection model*. Challenge dose:  $2 \times 10^6$  CFUs. Inoculation: intra nasal,  
697  $10^6$  CFUs in each nostril. Mice=10/group (two experiments with 5 animal/group each time). Mab were  
698 injected intraperitoneally 4 hours post infection. Dose of the Mabs: VSX=15mg/kg. Control Mab  
699 (against *Clostridioides difficile*): 15mg/kg. P. Value=0,04 measured by Log-Rank test.

700

701

702 **Figure 2. Design and screening of AMPs as potential AMPs.** (A) Workflow for identification of an  
703 AMP to deploy in the construction of an ADC. (B) Antimicrobial peptide P297 showed rapid  
704 bactericidal activity in a time-kill assay using *P. aeruginosa* ATCC 27853. A growth control was  
705 compared to P297 at 0.5, 1, 2, 4, 8, or 16x MIC of peptide or to ciprofloxacin at 8x its MIC. Note that  
706 the 4x, 8x, 16x, and Ciprofloxacin 8x MICs all overlap. (C) *Calcein leakage*. Mechanism of action for  
707 P297 likely involves membrane disruption as assessed by measuring calcein leakage using  
708 DOPE/DOPG liposomes. Various concentrations of peptide, from 0.05– 100  $\mu\text{g/ml}$ , were incubated with  
709 liposomes for a given amount of time (5-45 min). Release of calcein was assessed by measuring an  
710 increase in fluorescence at 530 nm compared to a non-peptide reference. Peptide concentrations above  
711 1  $\mu\text{g/ml}$  resulted in a measurable increase in fluorescence. (D) Assessment of resistance rates for P297  
712 compared to colistin using two different procedures. (E) Comparison between wild type *P. aeruginosa*  
713 ATCC strain 27853 and two resistant mutants to P297 indicates differences in drug sensitivity as well  
714 as phenotypic differences. Mutant strains demonstrated decreased sensitivity to P297.

715

716 **Figure 3. Synthesis, characterization and in vitro evaluation of VSX conjugates.** (A) Synthesis of  
717 antibody-AMP conjugates using sortase ligation. VSX was expressed in Expi293 cells with a (GS)<sub>15</sub>  
718 flexible linker and a sortase acceptor tag (LPETGGSG) present at the C-terminus of both the light chain  
719 and the heavy chain. Then, a (GGG)- modified antimicrobial peptide AMP (AMP, for example P297)  
720 was covalently added via incubation with recombinantly produced sortase for a target DAR of 4. (B)  
721 Size exclusion chromatography (SEC-HPLC) of VSX (red line) and VSX conjugate (blue line)  
722 indicating an earlier shift in elution time for the modified construct compared to the starting antibody.  
723 The peak width and height is similar between the constructs indicating a relative homogeneity in sortase  
724 modification. (C) *In vitro* killing activity of VSX conjugates. *P. aeruginosa* ATCC strains 27853 or  
725 39324 were treated with VSX conjugates with a DAR of ~4 containing AMP peptides 271, 293, 294,  
726 295, or 297 and conjugate IgG concentrations that result in 50% killing are recorded. (D) VSX-1 (VSX  
727 with peptide P297 and a DAR of ~4) was characterized by several assays including *in vitro* bactericidal  
728 activity, opsonic activity, hemolytic activity and cytotoxic activity.

729

730 **Figure 4. Synergy of P297 with different antibiotic classes.** MIC for both meropenem and colistin was  
731 determined alone and then varying concentrations of P297 were titrated to measure the effect on MIC  
732 towards *P. aeruginosa* ATCC 27853. (A) Examination of MIC for meropenem in the presence of



## VSX-1/2 Are Potent Bactericidal Antibody-Peptide Conjugates

733 different concentrations of P297. **(B)** Same as **(A)**, except colistin was used as the antibiotic. Not all  
734 antibiotics demonstrated synergy; for example, the aminoglycoside tobramycin did not exhibit an  
735 enhanced MIC in the presence of P297.

736

737 **Figure 5. Evaluation of conjugates in in vivo models of *P. aeruginosa* lung infection.** **(A)** Neutropenic  
738 animals co-administered VSX-1 and bacteria (ATCC 27853). CFU burden as measured in the lung at  
739 eight hours. Co-administration of 10 µg of VSX-1 resulted in a multi-log reduction in bacterial burden,  
740 with reduction to the limit of detection upon administering 200 µg of ADC. **(B)** Neutropenic animals  
741 were infected with *P. aeruginosa* (ATCC 27853) and were treated 1 hour post-infection with either  
742 vehicle or VSX-1 (200 µg). CFU burden was measured in the lungs just before treatment (pre-treatment)  
743 and in the lungs at eight hours post-injection. **(C)** Acute lung infection model with *P. aeruginosa* PA14  
744 ( $2 \times 10^6$  CFU/animal,  $10^6$  in each nostril), C57/Bl6, 10 animals/group (two experiments with 5  
745 animal/group each time), intranasal inoculation, intraperitoneal dosing (15 mg/kg) 4 hours post-  
746 infection.

747

748 **Figure 6. Biodistribution VSX-1.** **(A)** *In vivo* imaging of VSX-1 biodistribution. Labeled VSX  
749 (antibody alone) or VSX-1 (ADC) were administered to animals IP and followed by imaging out to 48  
750 hours post-injection (h.p.i.). Both agents distributed through the animal, to all perfused organs, but VSX-  
751 1 had a faster elimination, with little agent evident at 48 h.p.i. **(B)** Analysis of serum levels by ELISA  
752 of VSX-1 (DAR4) (grey bars) at 1, 24, and 72 hours post-injection and DAR2 constructs (black bars).  
753 **(C)** Same imaging procedure as **(A)** but with a DAR 2 demonstrates better biodistribution and half-life  
754 of the ADC.

755

756 **Figure 7. In vitro and in vivo assessment of VSX-2.** **(A)** Activity of VSX-2 compared to VSX-1 as  
757 measured by the (bacterial) Killing Assay, hemolysis of red blood cells (mean lytic concentration  
758 (MLC)) and toxicity to mammalian cells ( $CC_{50}$ ). The bactericidal activity of VSX-2 is similar, but  
759 slightly lower, than that of VSX-1, with a lower DAR, and with a similar inability to lyse RBCs or kill  
760 mammalian cells. **(B)** VSX-2 has similar activity *in vivo* in the acute lung infection model with *P.*  
761 *aeruginosa* PA14 ( $2 \times 10^6$  CFUs/animal,  $10^6$  CFUs in each nostril), C57/Bl6, 25 animals/group (five  
762 experiments with 5 animal/group each time), intranasal inoculation, intraperitoneal dosing (15 mg/kg)  
763 4 hours post-infection.

764

765 **Figure 8: Prevention and treatment of *P. aeruginosa* PA14 biofilm in dynamic model marked with**  
766 **Syto9 (green) and PI (red) fluorochromes.**

767 **(A-B).** **A:** untreated biofilm (control) and **B:** Treated biofilm with 6 µg/mL of DAR2 (VSX-2) during  
768 1h at 47h (top), 30h (middle) and 24h (bottom). **(C)** Prevention of biofilm, injection of 6 µg/mL of  
769 DAR2 (VSX-2) during bacterial inoculation at time 0. **(D)** Fluorescence volume of biofilm biomass with  
770 repartition of Syto9 and PI staining; scale = 100 µm. Acquisition of images by fluorescent microscopy  
771 of two joined fields of one sample and calculation by Imaris software. Experiments were repeated three  
772 times.

773

774

775



## VSX-1/2 Are Potent Bactericidal Antibody-Peptide Conjugates

### 776 References

- 777 1. Peleg AY, Hooper, D.C. Hospital-acquired infections due to gram-negative bacteria. *N Engl J*  
778 *Med.* 2010;362(19):1804-13.
- 779 2. Prevention CfDca. Antibiotic Resistance Threats in the United States, 2019. Atlanta, GA:  
780 Centers for Disease Control and Prevention 2019. Available from:  
781 <https://www.cdc.gov/drugresistance/pdf/threatsreport/2019-ar-threats-report-508.pdf>.
- 782 3. Jovcic B, Lepsanovic Z, Suljagic V, Rackov G, Begovic J, Topisirovic L, et al. Emergence of NDM-  
783 1 metallo-beta-lactamase in *Pseudomonas aeruginosa* clinical isolates from Serbia. *Antimicrob*  
784 *Agents Chemother.* 2011;55(8):3929-31.
- 785 4. Roux D, Danilchanka O, Guillard T, Cattoir V, Aschard H, Fu Y, et al. Fitness cost of antibiotic  
786 susceptibility during bacterial infection. *Science translational medicine.* 2015;7(297):297ra114.
- 787 5. Skurnik D, Roux D, Cattoir V, Danilchanka O, Lu X, Yoder-Himes DR, et al. Enhanced in vivo  
788 fitness of carbapenem-resistant oprD mutants of *Pseudomonas aeruginosa* revealed through high-  
789 throughput sequencing. *Proceedings of the National Academy of Sciences of the United States of*  
790 *America.* 2013;110(51):20747-52.
- 791 6. Kunz AN, Brook I. Emerging resistant Gram-negative aerobic bacilli in hospital-acquired  
792 infections. *Chemotherapy.* 2010;56(6):492-500.
- 793 7. Blaser J, Stone BB, Groner MC, Zinner SH. Comparative study with enoxacin and netilmicin in  
794 a pharmacodynamic model to determine importance of ratio of antibiotic peak concentration to MIC  
795 for bactericidal activity and emergence of resistance. *Antimicrob Agents Chemother.*  
796 1987;31(7):1054-60.
- 797 8. Kumarasamy KK, Toleman MA, Walsh TR, Bagaria J, Butt F, Balakrishnan R, et al. Emergence  
798 of a new antibiotic resistance mechanism in India, Pakistan, and the UK: a molecular, biological, and  
799 epidemiological study. *Lancet Infect Dis.* 2010;10(9):597-602.
- 800 9. He T, Wang R, Liu D, Walsh TR, Zhang R, Lv Y, et al. Emergence of plasmid-mediated high-  
801 level tigecycline resistance genes in animals and humans. *Nat Microbiol.* 2019;4(9):1450-6.
- 802 10. Tsiodras S, Gold HS, Sakoulas G, Eliopoulos GM, Wennersten C, Venkataraman L, et al.  
803 Linezolid resistance in a clinical isolate of *Staphylococcus aureus*. *Lancet.* 2001;358(9277):207-8.
- 804 11. Willing BP, Russell SL, Finlay BB. Shifting the balance: antibiotic effects on host-microbiota  
805 mutualism. *Nat Rev Microbiol.* 2011;9(4):233-43.
- 806 12. Modi SR, Collins JJ, Relman DA. Antibiotics and the gut microbiota. *J Clin Invest.*  
807 2014;124(10):4212-8.
- 808 13. Elli S, Alekseeva A, Ramakrishnan B, Koch T, Wollacott A, Viswanathan K, et al.  
809 Characterization of an Antibody Recognizing the Conserved Inner Core of *Pseudomonas aeruginosa*  
810 Lipopolysaccharides. *Biochemistry.* 2020;59(43):4202-11.
- 811 14. Mariathan S, Tan MW. Antibody-Antibiotic Conjugates: A Novel Therapeutic Platform  
812 against Bacterial Infections. *Trends Mol Med.* 2017;23(2):135-49.
- 813 15. Horcajada JP, Montero M, Oliver A, Sorli L, Luque S, Gomez-Zorrilla S, et al. Epidemiology and  
814 Treatment of Multidrug-Resistant and Extensively Drug-Resistant *Pseudomonas aeruginosa*  
815 Infections. *Clin Microbiol Rev.* 2019;32(4).
- 816 16. Raetz CR, Whitfield C. Lipopolysaccharide endotoxins. *Annu Rev Biochem.* 2002;71:635-700.
- 817 17. Campodonico VL, Llosa NJ, Grout M, Doring G, Maira-Litran T, Pier GB. Evaluation of flagella  
818 and flagellin of *Pseudomonas aeruginosa* as vaccines. *Infect Immun.* 2010;78(2):746-55.
- 819 18. Pozzi C, Wilk K, Lee JC, Gening M, Nifantiev N, Pier GB. Opsonic and protective properties of  
820 antibodies raised to conjugate vaccines targeting six *Staphylococcus aureus* antigens. *PLoS One.*  
821 2012;7(10):e46648.
- 822 19. Velkov T, Roberts KD, Thompson PE, Li J. Polymyxins: a new hope in combating Gram-  
823 negative superbugs? *Future medicinal chemistry.* 2016;8(10):1017-25.
- 824 20. Bahar AA, Ren D. Antimicrobial peptides. *Pharmaceuticals.* 2013;6(12):1543-75.
- 825 21. Roversi D, Luca V, Aureli S, Park Y, Mangoni ML, Stella L. How many antimicrobial peptide  
826 molecules kill a bacterium? The case of PMAP-23. *ACS Chem Biol.* 2014;9(9):2003-7.

## VSX-1/2 Are Potent Bactericidal Antibody-Peptide Conjugates

- 827 22. Bals R, Wilson JM. Cathelicidins--a family of multifunctional antimicrobial peptides. Cellular  
828 and molecular life sciences : CMLS. 2003;60(4):711-20.
- 829 23. Hing TC, Ho S, Shih DQ, Ichikawa R, Cheng M, Chen J, et al. The antimicrobial peptide  
830 cathelicidin modulates *Clostridium difficile*-associated colitis and toxin A-mediated enteritis in mice.  
831 Gut. 2013;62(9):1295-305.
- 832 24. Wang Y, Hong J, Liu X, Yang H, Liu R, Wu J, et al. Snake cathelicidin from *Bungarus fasciatus* is  
833 a potent peptide antibiotics. PLoS One. 2008;3(9):e3217.
- 834 25. Jobin ML, Bonnafous P, Tamsamani H, Dole F, Grelard A, Dufourc EJ, et al. The enhanced  
835 membrane interaction and perturbation of a cell penetrating peptide in the presence of anionic  
836 lipids: toward an understanding of its selectivity for cancer cells. Biochim Biophys Acta.  
837 2013;1828(6):1457-70.
- 838 26. Melnyk AH, Wong A, Kassen R. The fitness costs of antibiotic resistance mutations. Evol Appl.  
839 2015;8(3):273-83.
- 840 27. Oddo A, Hansen PR. Hemolytic Activity of Antimicrobial Peptides. Methods in molecular  
841 biology. 2017;1548:427-35.
- 842 28. Chen S, Gfeller D, Buth SA, Michielin O, Leiman PG, Heinis C. Improving binding affinity and  
843 stability of peptide ligands by substituting glycines with D-amino acids. ChemBiochem : a European  
844 journal of chemical biology. 2013;14(11):1316-22.
- 845 29. Ng-Choi I, Soler M, Guell I, Badosa E, Cabrefiga J, Bardaji E, et al. Antimicrobial peptides  
846 incorporating non-natural amino acids as agents for plant protection. Protein and peptide letters.  
847 2014;21(4):357-67.
- 848 30. Mao H, Hart SA, Schink A, Pollok BA. Sortase-mediated protein ligation: a new method for  
849 protein engineering. Journal of the American Chemical Society. 2004;126(9):2670-1.
- 850 31. Singer M, Deutschman CS, Seymour CW, Shankar-Hari M, Annane D, Bauer M, et al. The Third  
851 International Consensus Definitions for Sepsis and Septic Shock (Sepsis-3). Jama. 2016;315(8):801-10.
- 852 32. Zavascki AP, Barth AL, Fernandes JF, Moro AL, Goncalves AL, Goldani LZ. Reappraisal of  
853 *Pseudomonas aeruginosa* hospital-acquired pneumonia mortality in the era of metallo-beta-  
854 lactamase-mediated multidrug resistance: a prospective observational study. Critical care.  
855 2006;10(4):R114.
- 856 33. Dudhani RV, Turnidge JD, Coulthard K, Milne RW, Rayner CR, Li J, et al. Elucidation of the  
857 pharmacokinetic/pharmacodynamic determinant of colistin activity against *Pseudomonas aeruginosa*  
858 in murine thigh and lung infection models. Antimicrob Agents Chemother. 2010;54(3):1117-24.
- 859 34. Babcock GJ, Broering TJ, Hernandez HJ, Mandell RB, Donahue K, Boatright N, et al. Human  
860 monoclonal antibodies directed against toxins A and B prevent *Clostridium difficile*-induced mortality  
861 in hamsters. Infect Immun. 2006;74(11):6339-47.
- 862 35. Fletcher MA, Kloczewiak MA, Loisele PM, Ogata M, Vermeulen MW, Zanzot EM, et al. A  
863 novel peptide-IgG conjugate, CAP18(106-138)-IgG, that binds and neutralizes endotoxin and kills  
864 gram-negative bacteria. The Journal of infectious diseases. 1997;175(3):621-32.
- 865 36. Khera E, Thurber GM. Pharmacokinetic and Immunological Considerations for Expanding the  
866 Therapeutic Window of Next-Generation Antibody-Drug Conjugates. BioDrugs : clinical  
867 immunotherapeutics, biopharmaceuticals and gene therapy. 2018;32(5):465-80.
- 868 37. Lehar SM, Pillow T, Xu M, Staben L, Kajihara KK, Vandlen R, et al. Novel antibody-antibiotic  
869 conjugate eliminates intracellular *S. aureus*. Nature. 2015;527(7578):323-8.
- 870 38. Theuretzbacher U, Outtersson K, Engel A, Karlen A. The global preclinical antibacterial  
871 pipeline. Nat Rev Microbiol. 2019.
- 872 39. Pranting M, Andersson DI. Mechanisms and physiological effects of protamine resistance in  
873 *Salmonella enterica* serovar Typhimurium LT2. J Antimicrob Chemother. 2010;65(5):876-87.
- 874 40. Card KJ, LaBar T, Gomez JB, Lenski RE. Historical contingency in the evolution of antibiotic  
875 resistance after decades of relaxed selection. PLoS Biol. 2019;17(10):e3000397.

876

877

## VSX-1/2 Are Potent Bactericidal Antibody-Peptide Conjugates

878 **Appendices.** Supplemental Information is included (**Figures S1-S6 and Table S1**).

879 **Figure S1.**

880 CD Analysis of P297. Circular dichroism spectra of P297 in buffer with increasing hydrophobic content.  
881 Graph shows increasing alpha-helical character with hydrophobicity.

882

883 **Figure S2.**

884 (D)-P297 is more stable than (L)-P297 in the presence of human serum. (left) Representative total ion  
885 chromatograms of P297 at t=0 (top) and after 60 minutes in 10% normal human serum (NHS). Intact  
886 peptide remaining was quantified by integration of extracted ion current for (L)- or (D)-P297. (right)  
887 Sixty-minute time course of degradation of P297 variants in the presence of 10% normal human serum  
888 (NHS). Values were normalized to the starting peptide content measured at time = 0 min.

889

890 **Figure S3.**

891 Analysis of Conversion of VSX to DAR2 and DAR4. (A) Q-tof analysis of the heavy chain of starting  
892 material and sortase-ligated D-P297 product for sortase acceptors on both the heavy and light chains  
893 (top two panels), and for sortase acceptors on only the heavy chains (bottom two panels). Assuming  
894 unbiased detection of starting material and product, 88.7% of the heavy chain for DAR4 material was  
895 ligated to D-P297. (B) Coomassie gel analysis showing conversion of starting material to desired D-  
896 P297 ADC product. Lanes 1 and 2 are the starting material and product for D-P297 ligation to both  
897 heavy and light chains. A second gel containing lanes 3 and 4 are respectively the starting material and  
898 product for D-P297 ligation to only the heavy chains (the light chain in the antibody starting material  
899 was wild-type lacking the sortase acceptor recognition sequence). (c) Calculation of the average DAR  
900 for constructs using deconvoluted spectra: with a theoretical DAR of 4, the experimentally determined  
901 DAR was 3.8; for the theoretical DAR of 2, the experimentally determined average DAR was 1.8.

902

903 **Figure S4.**

904 Mixed microbial killing assay. *P. aeruginosa* (blue), *E. coli* (red) and *K. pneumoniae* (green) were co-  
905 cultured overnight, diluted and then subjected to the specified agent for two hours. Killing was  
906 assessed visually. (left) Peptide P297 alone killing of *P. aeruginosa* and *E. coli*. (middle) In the absence  
907 of complement or immune cells, VSX alone had no killing effect. (right) VSX-1 demonstrated more rapid  
908 and complete killing of *P. aeruginosa*.

909

910 **Figure S6.**

911 Neutralization of *P. aeruginosa* LPS activity in vitro. Binding of either VSX (blue) or actoxumab (grey)  
912 to LPS in a developed and optimized cell-based LPS neutralization assay. HEK-Blue LPS detection Kit  
913 was ordered from Invivogen to investigate the ability of VSX to neutralize endotoxin activity of  
914 extracted *P. aeruginosa* LPS on HEK-blue cells. In this case, endotoxin present in the media or standard  
915 is sensed by TLR4 leading to the activation of NF-kB and the production of SEAP in the supernatant.  
916 When supernatant is combined with QUANTI-Blue, this activation can be visualized and compared to  
917 a standard curve. 0.5 EU/ml *P. aeruginosa* LPS serotype was used for all assays.

918

## VSX-1/2 Are Potent Bactericidal Antibody-Peptide Conjugates

919

920 Table S1: Strains used in the study

921

| Assay                  | Origin                                 | name                                                                                                              |
|------------------------|----------------------------------------|-------------------------------------------------------------------------------------------------------------------|
| MIC and Killing assays | ATCC strains                           | <i>P. aeruginosa</i> 27853, 39324, 2108. <i>E. coli</i> 25922, <i>S. aureus</i> 29213, <i>K. pneumoniae</i> 33495 |
| OPKA                   | Infection and Immunity (17)            | <i>P. aeruginosa</i> PA01                                                                                         |
| Acute Lung Model       | Science Translational Medicine (4)     | <i>P. aeruginosa</i> PA14                                                                                         |
| Neutropenic Mice       | Antimicrobial Agents Chemotherapy (33) | <i>P. aeruginosa</i> ATCC 27853                                                                                   |
| Biofilm                | This study                             | <i>P. aeruginosa</i> PA14                                                                                         |

922

923 MIC=Minimum Inhibitory Concentration

924 OPKA=Opsonophagocytosis Killing Assay

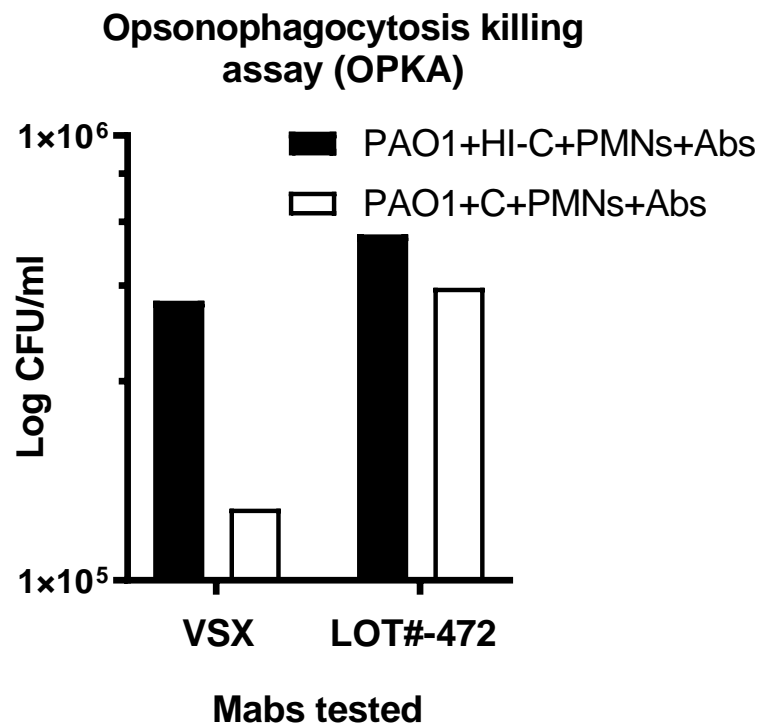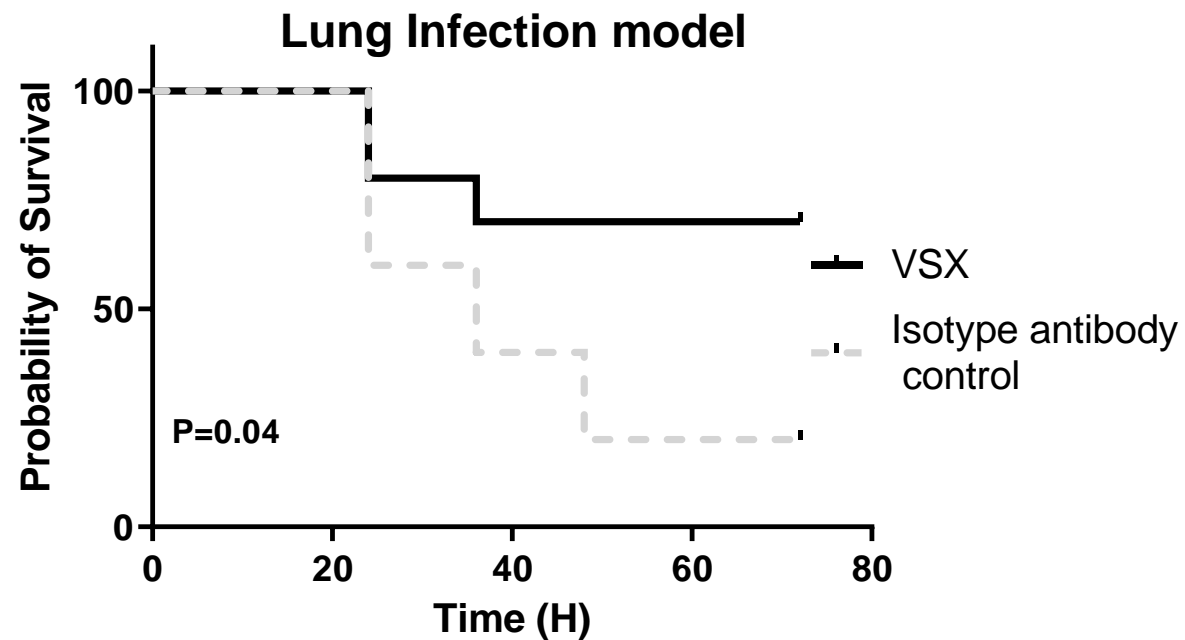

Figure 1

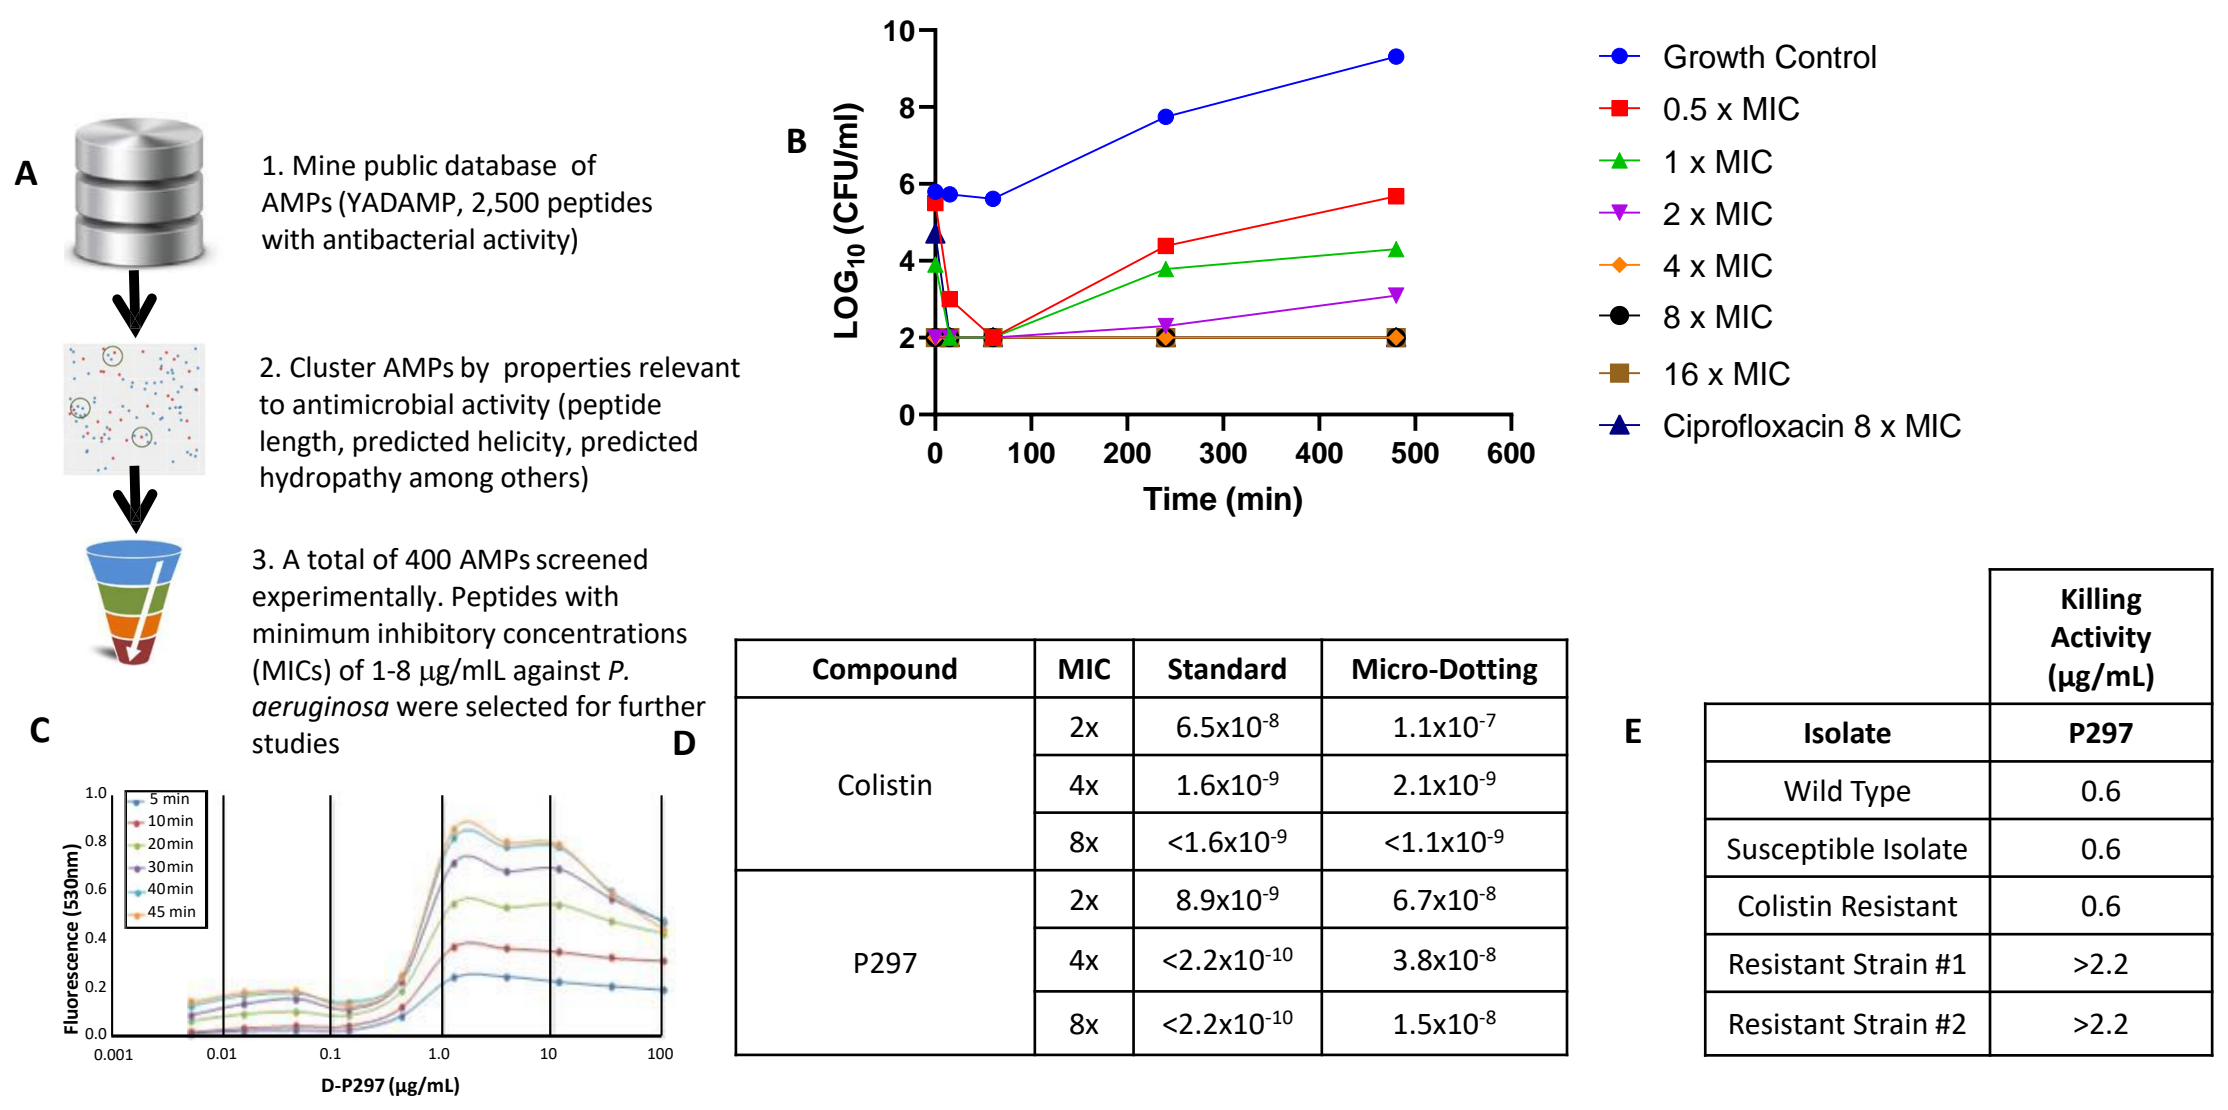

Figure 2

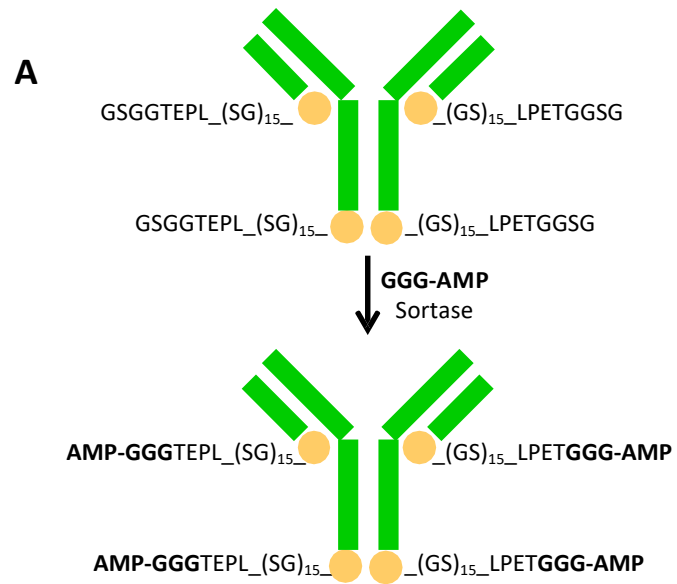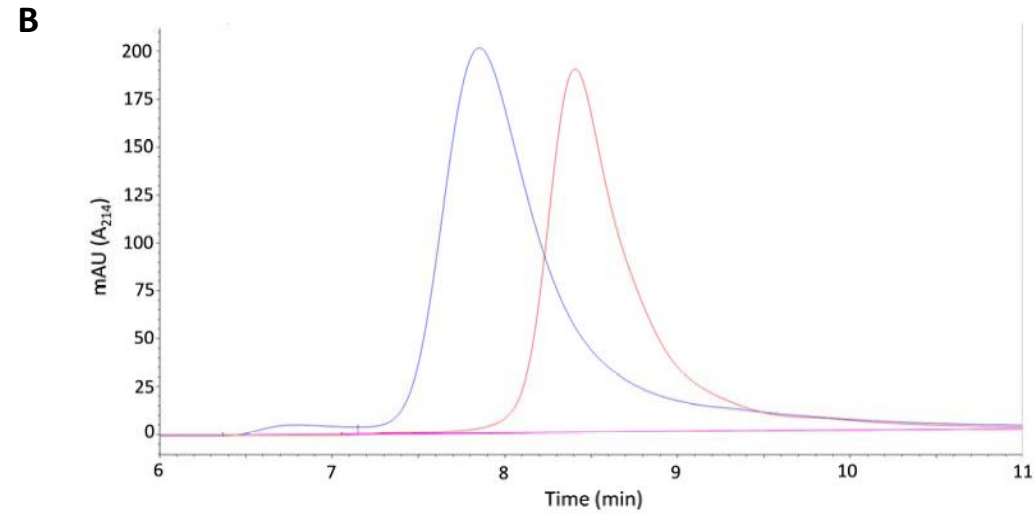

**C**

|            | Killing Activity (µg/mL) attached to VSX (DAR4) |              |
|------------|-------------------------------------------------|--------------|
| <b>AMP</b> | <b>27853</b>                                    | <b>39324</b> |
| P271       | 25                                              | 6.3          |
| P293       | 25                                              | 12.5         |
| P294       | 6.3                                             | 3.1          |
| P295       | 6.3                                             | 0.8          |
| P297       | 1.6                                             | 0.4          |

**D**

| VSX-1 Activity Profile (EC/CC <sub>50</sub> , µg/mL) |      |
|------------------------------------------------------|------|
| Bactericidal <sup>1</sup>                            | 1-4  |
| Opsonic <sup>2</sup>                                 | 20   |
| Hemolytic <sup>3</sup>                               | >340 |
| Cytotoxicity <sup>4</sup>                            | ~310 |

1. Activity determined by MIC assay; 2. Uptake and killing by PBMCs in the presence of VSX; 3. Lysis of red blood cells PLC; 4. Measured ability to kill 293T cells

**Figure 3**



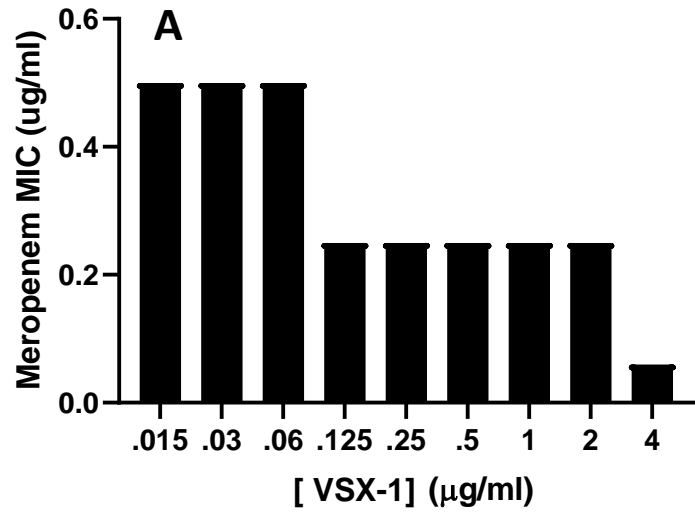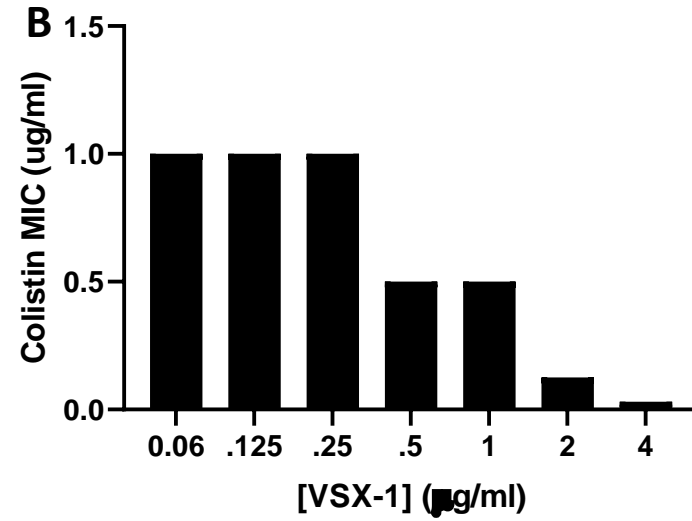

Figure 4

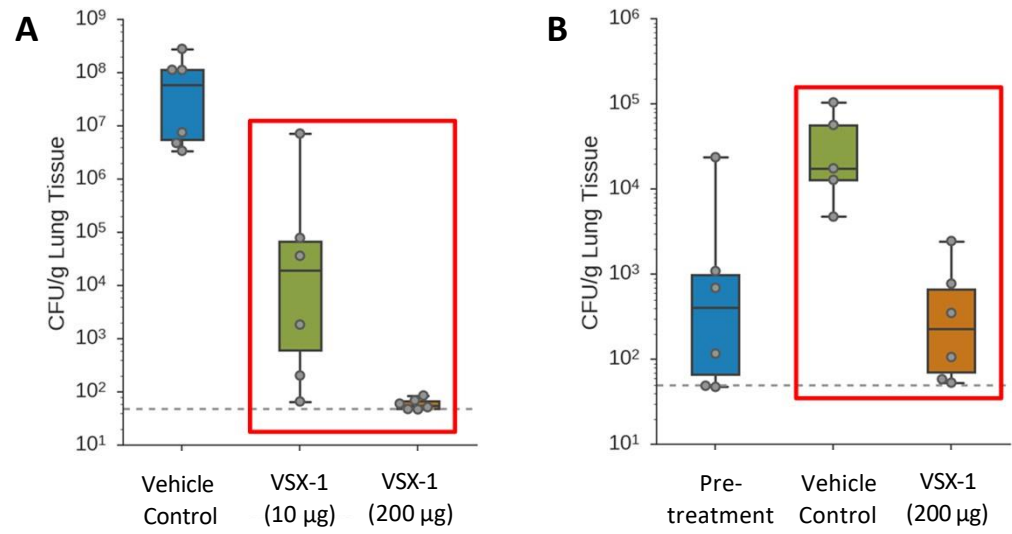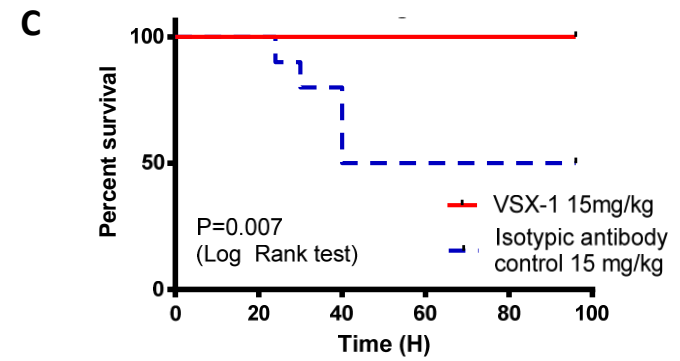

Figure 5

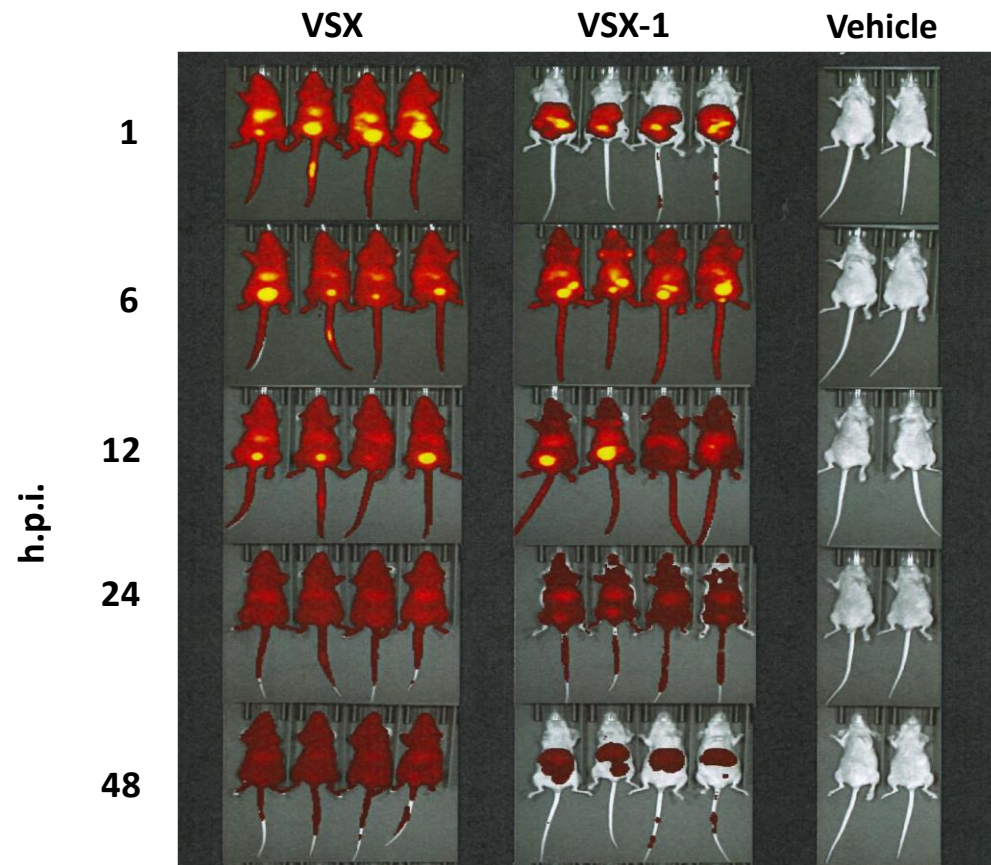

Figure 6A

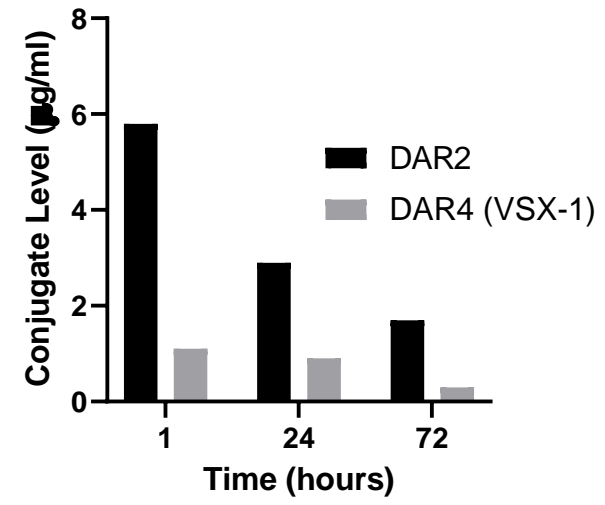

Figure 6B

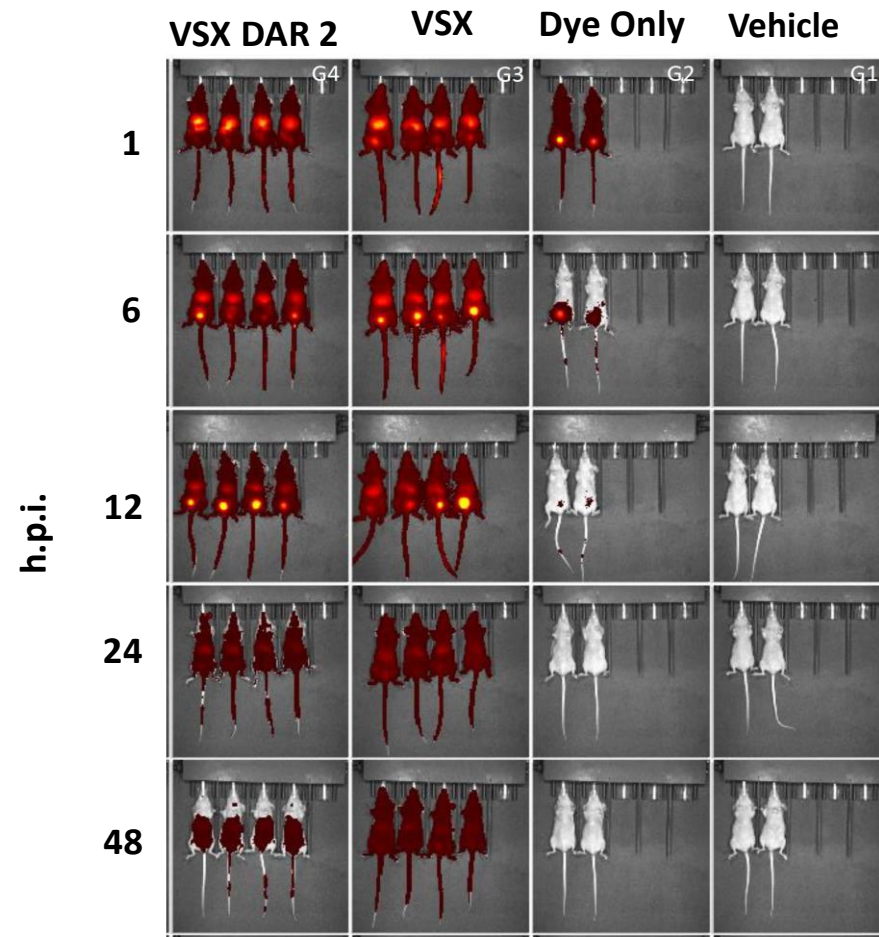

Figure 6C

**A**

|                                                        | VSX-1      | VSX-2  |
|--------------------------------------------------------|------------|--------|
| DAR                                                    | 4          | 2      |
| Killing ( $\mu\text{g/mL}$ )                           | 0.4-6.3    | 3.1-25 |
| Hemolytic (MLC) ( $\mu\text{g/mL}$ )                   | >800       | >800   |
| Cytotoxicity ( $\text{CC}_{50}$ ) ( $\mu\text{g/mL}$ ) | $\sim 300$ | >800   |

**B**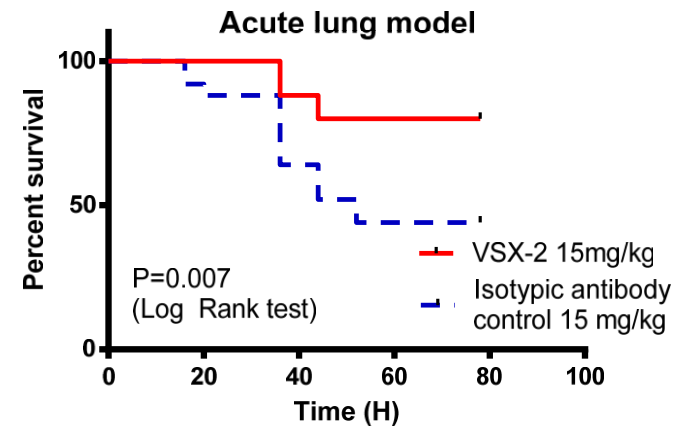**Figure 7**

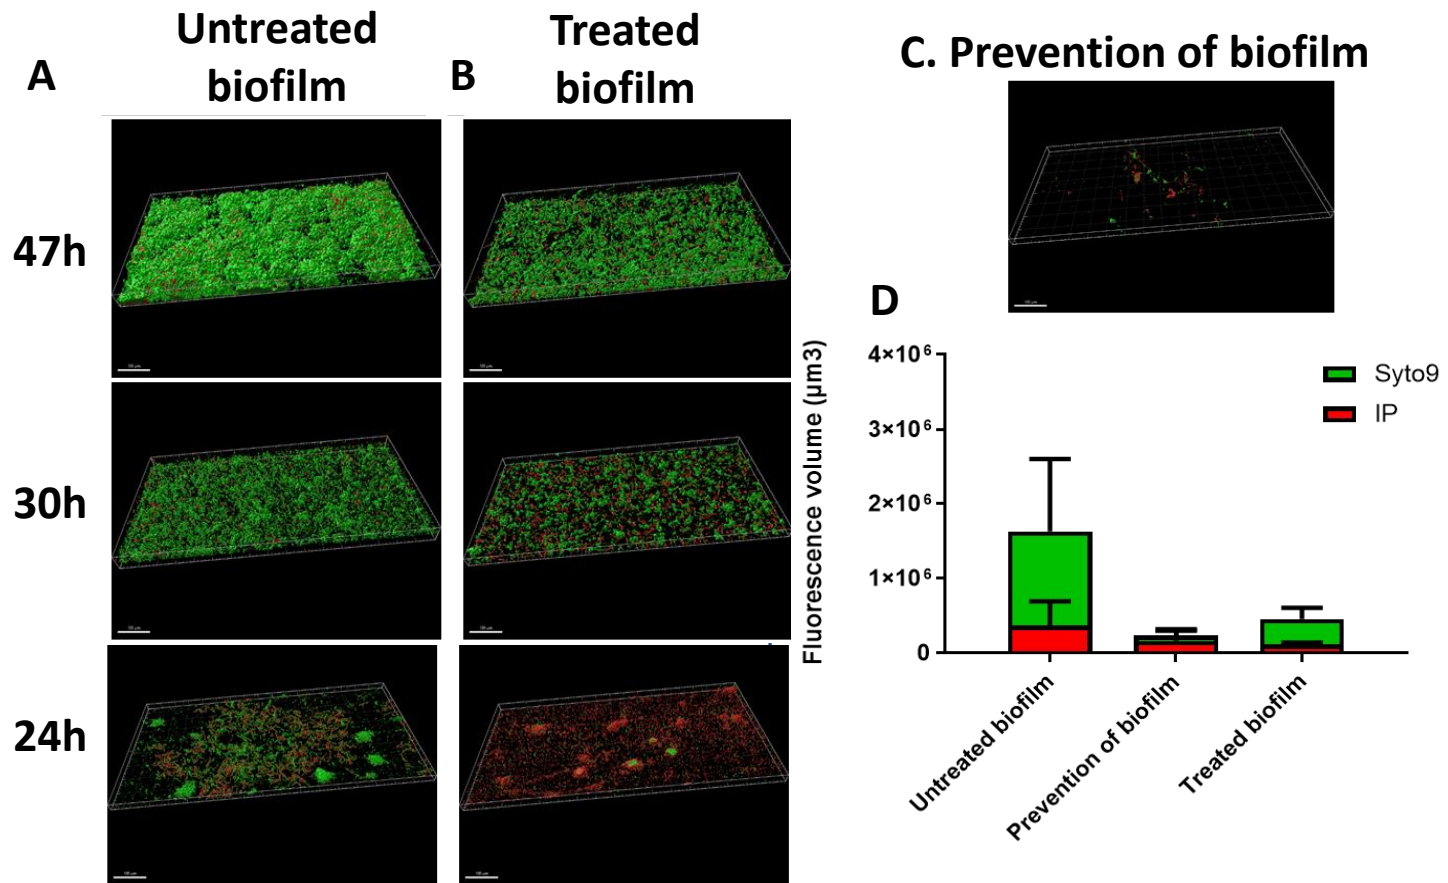

**Figure 8**



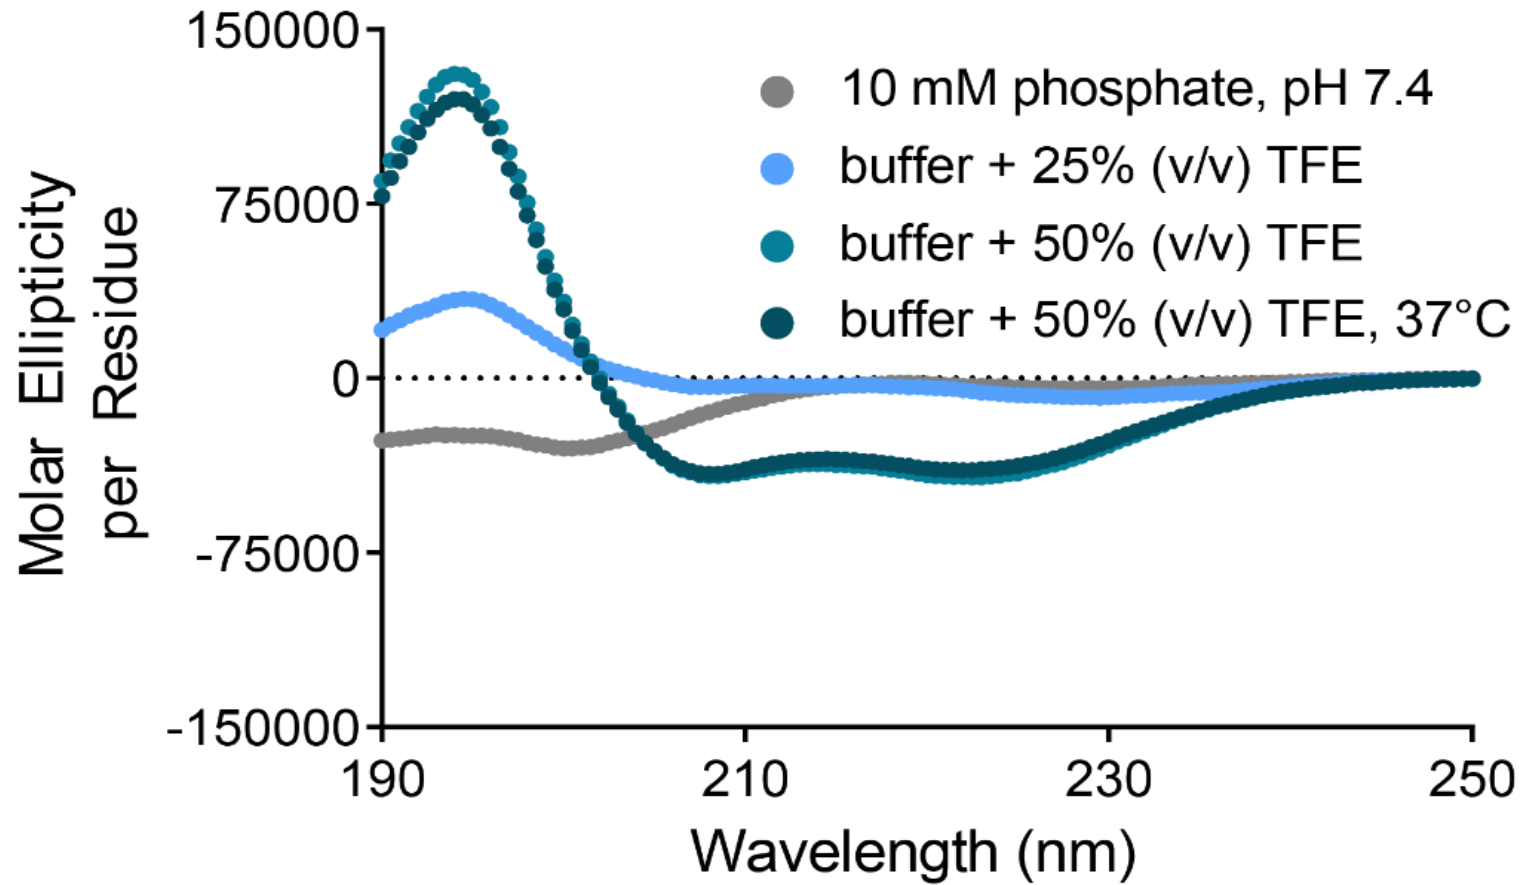

**Figure S1. CD Analysis of P297** Circular dichroism spectra of P297 in buffer with increasing hydrophobic content. Graph shows increasing alpha-helical character with hydrophobicity.

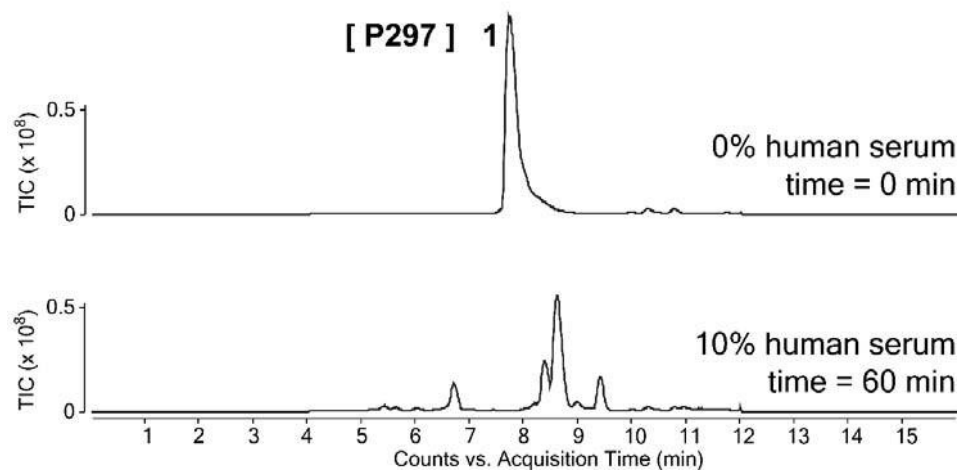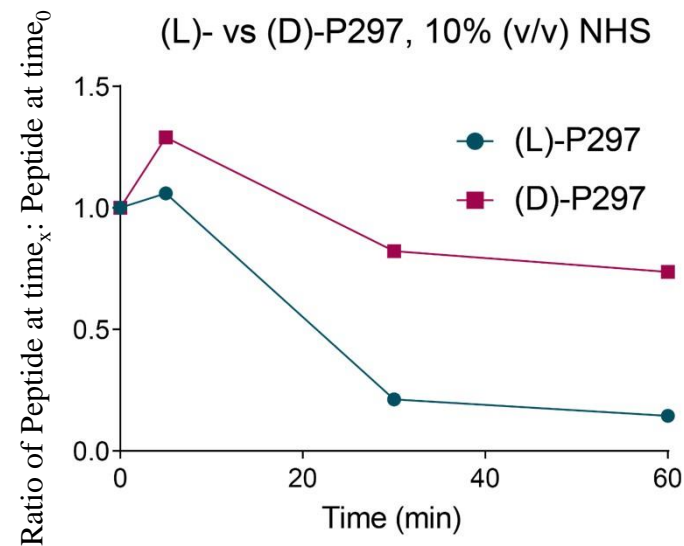

**Figure S2.** *(D)-P297 is more stable than (L)-P297 in the presence of human serum.* (left) Representative total ion chromatograms of P297 at  $t=0$  (top) and after 60 minutes in 10% normal human serum (NHS). Intact peptide remaining was quantified by integration of extracted ion current for (L)- or (D)-P297. (right) Sixty-minute time course of degradation of P297 variants in the presence of 10% normal human serum (NHS). Values were normalized to the starting peptide content measured at time = 0 min.

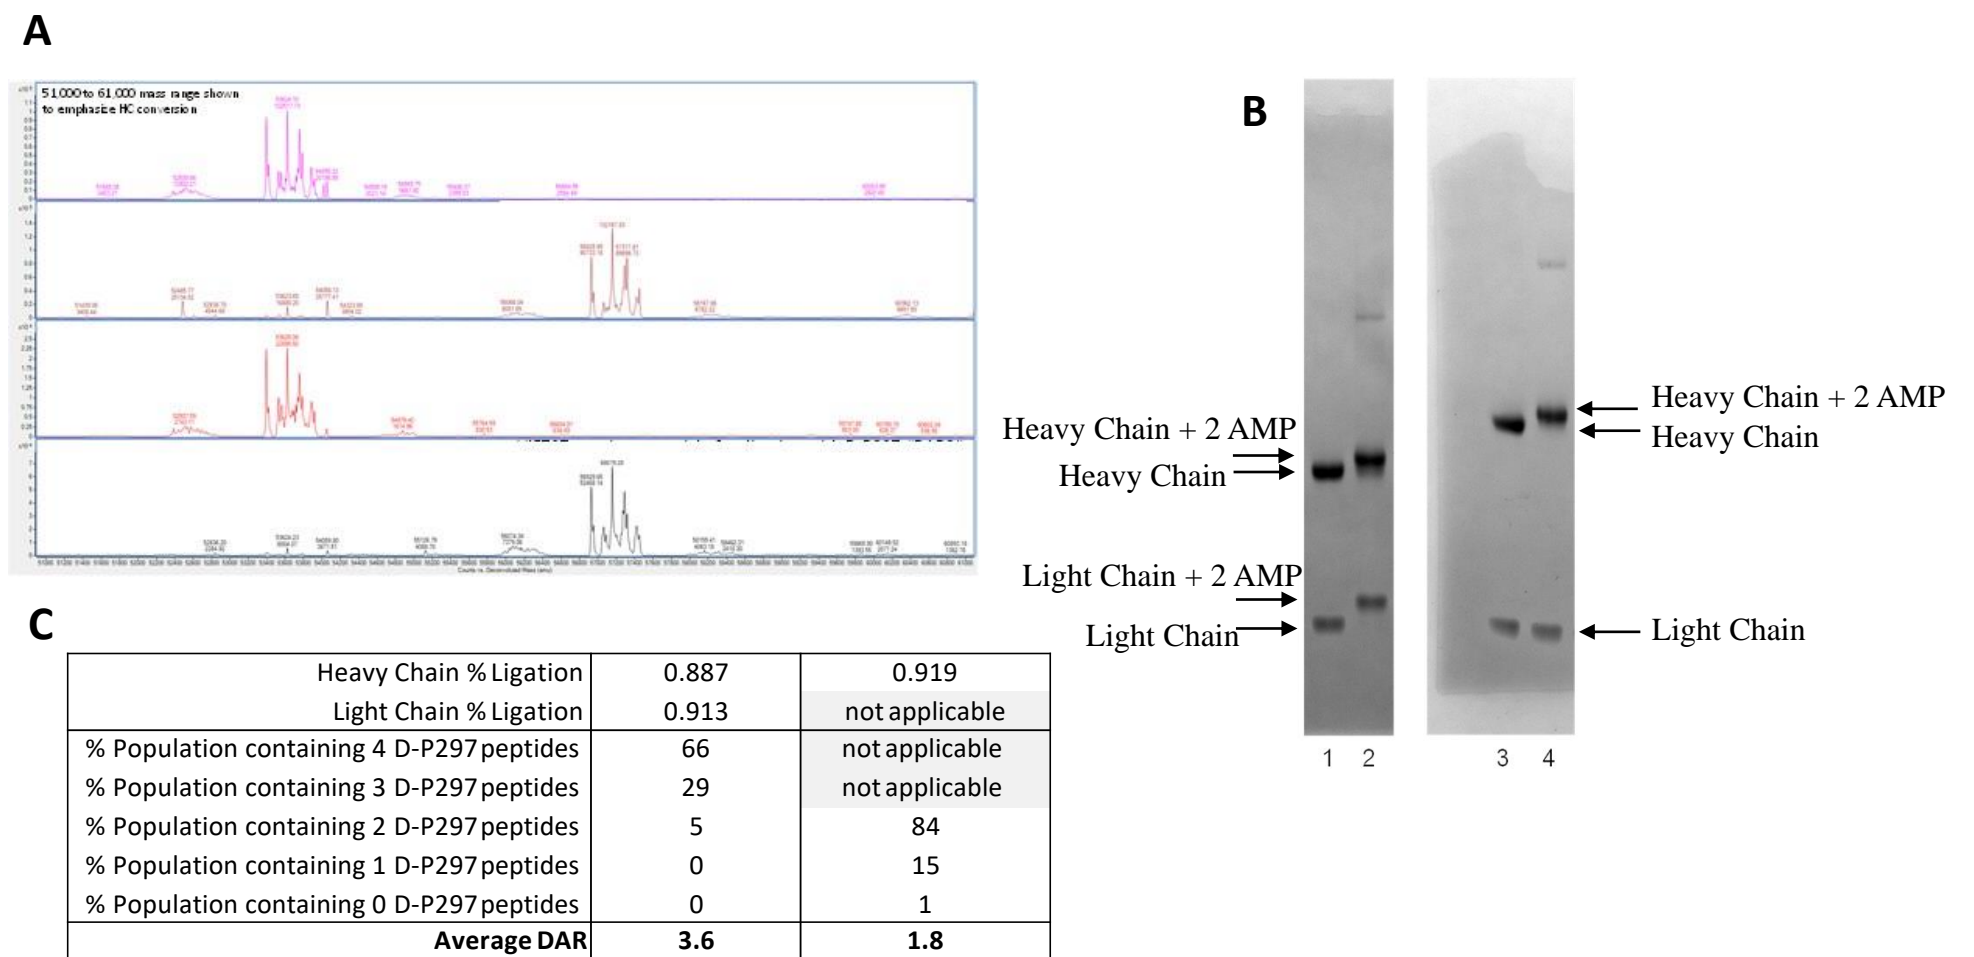

**Figure S3. Analysis of Conversion of VSX to DAR2 and DAR4.** (A) *Q-tof* analysis of the heavy chain of starting material and sortase-ligated D-P297 product for sortase acceptors on both the heavy and light chains (top two panels), and for sortase acceptors on only the heavy chains (bottom two panels). Assuming unbiased detection of starting material and product, 88.7% of the heavy chain for DAR4 material was ligated to D-P297. (B) Coomassie gel analysis showing conversion of starting material to desired D-P297 ADC product. Lanes 1 and 2 are the starting material and product for D-P297 ligation to both heavy and light chains. A second gel containing lanes 3 and 4 are respectively the starting material and product for D-P297 ligation to only the heavy chains (the light chain in the antibody starting material was wild-type lacking the sortase acceptor recognition sequence). (c) Calculation of the average DAR for constructs using TIC trace : with a theoretical DAR of 4, the experimentally determined DAR was 3.8; for the theoretical DAR of 2, the experimentally determined average DAR was 1.8.

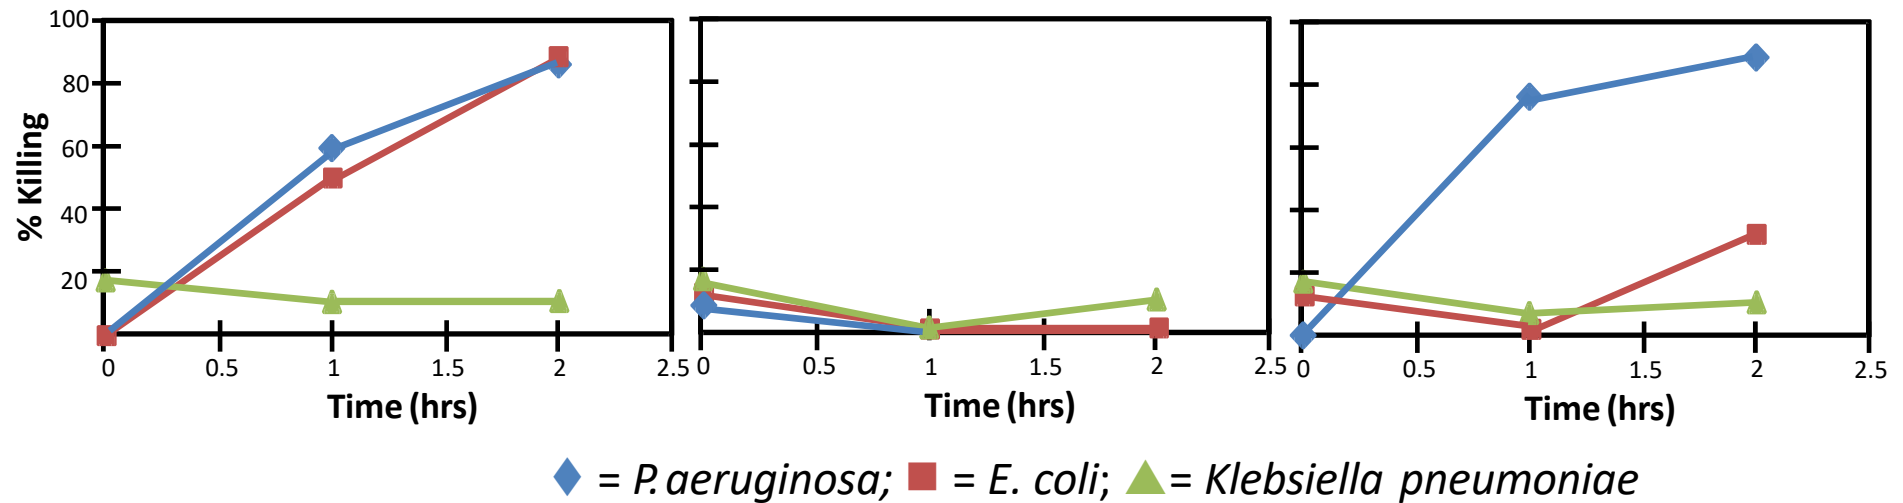

**Figure S4.** Mixed microbial killing assay. *P. aeruginosa* ATCC 2108 (blue), *E. coli* ATCC 25922 (red) and *K. pneumoniae* ATCC 33495 (green) were co-cultured overnight, diluted and then subjected to the specified agent for two hours. Killing was assessed visually. (*left*) Peptide D297 alone killing of *P. aeruginosa* and *E. coli*. (*middle*) In the absence of complement or immune cells, VSX alone had no killing effect. (*right*) VSX-1 demonstrated more rapid and complete killing of *P. aeruginosa*.

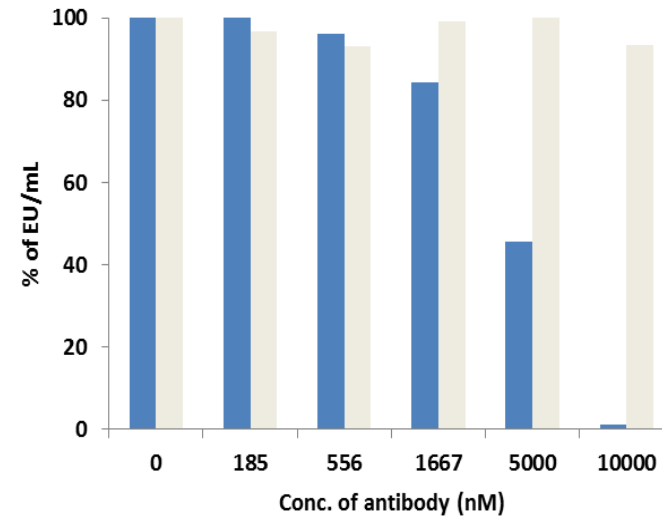

**Figure S5.** *Neutralization of P. aeruginosa LPS activity in vitro.* Binding of either VSX (blue) or actoxumab (grey) to LPS. a cell-based LPS neutralization assay was developed and optimized. HEK-Blue LPS detection Kit was ordered from Invivogen to investigate the ability of VSX to neutralize endotoxin activity of extracted *Pseudomonas* LPS on HEK-blue cells. In this case, endotoxin present in the media or standard are sensed by TLR4 leading to the activation of NF- $\kappa$ B and the production of SEAP in the supernatant. When supernatant is combined with QUANTI-Blue, this activation can be visualized and compared to a standard curve. 0.5 EU/mL *P. aeruginosa* LPS serotype was used for all assays.
